# Supplementary material for: Efficient one-pot synthesis of functionalised imidazo[1,2-a]pyridines and unexpected synthesis of novel tetracyclic derivatives by nucleophilic aromatic substitution
Source: Royal Society of Chemistry journal article supplement (doi:10.1039/c9ra10447j), 2020-01-01

NMR spectra for *rac-9*

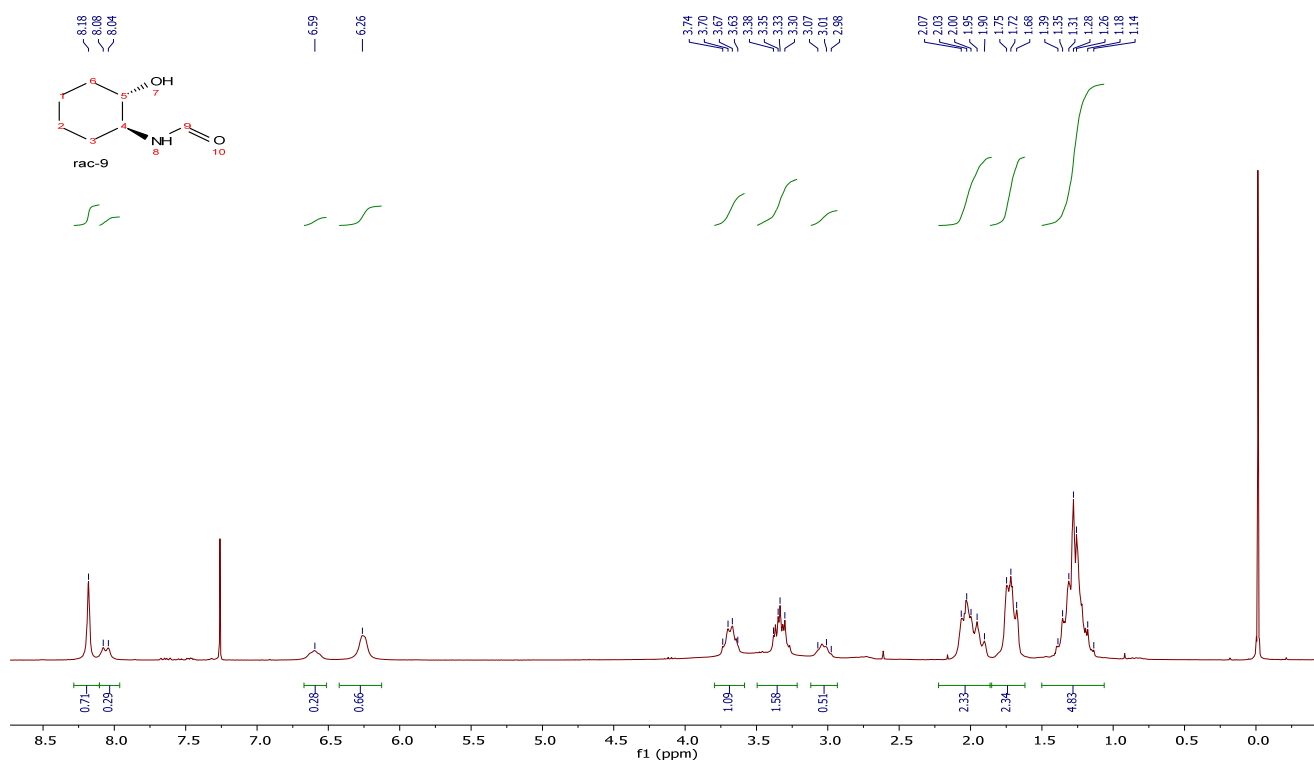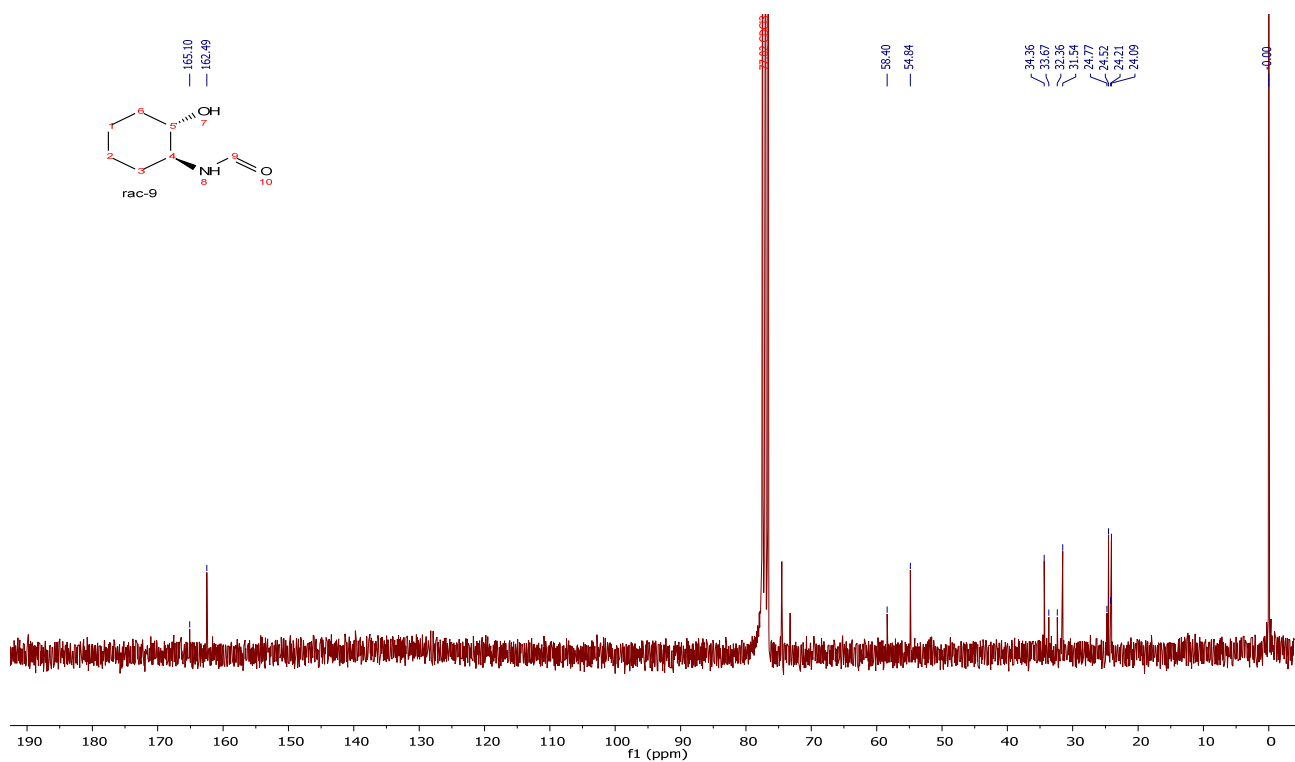

NMR spectra for *rac*-10

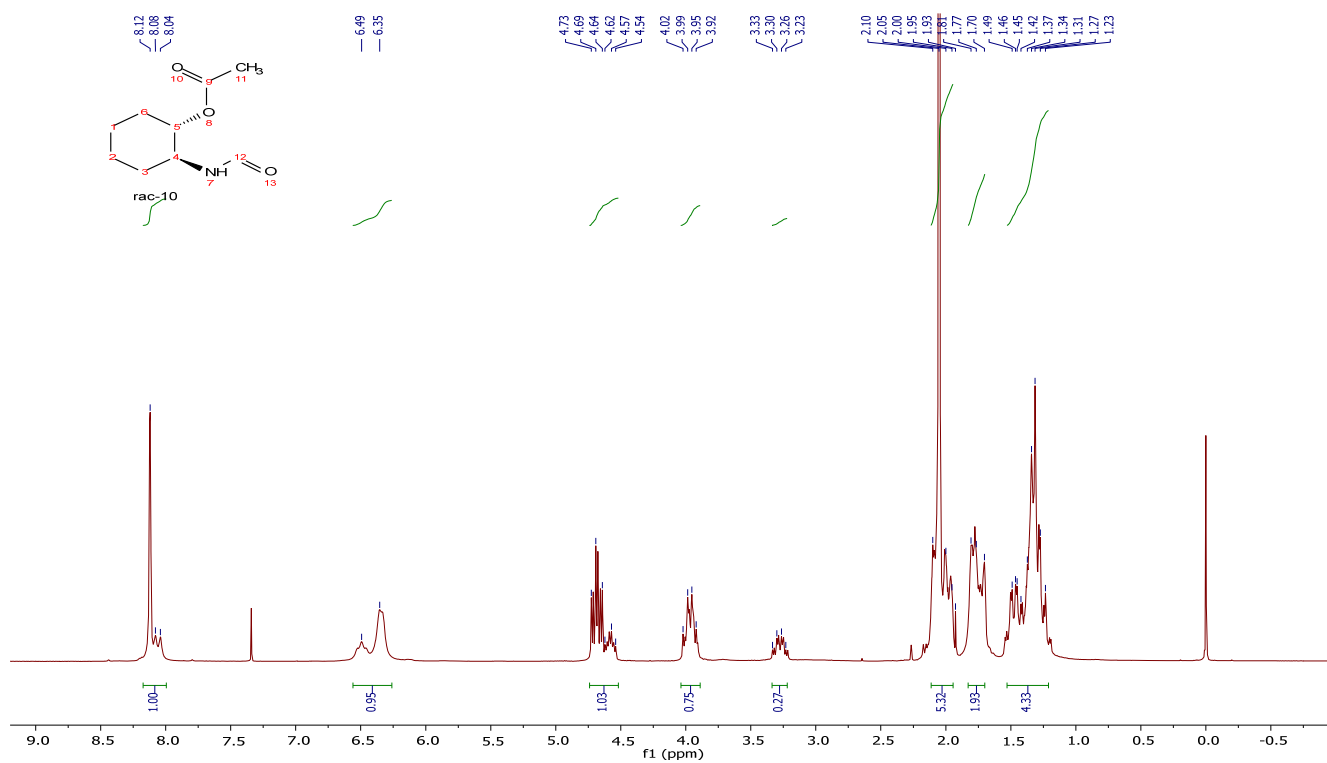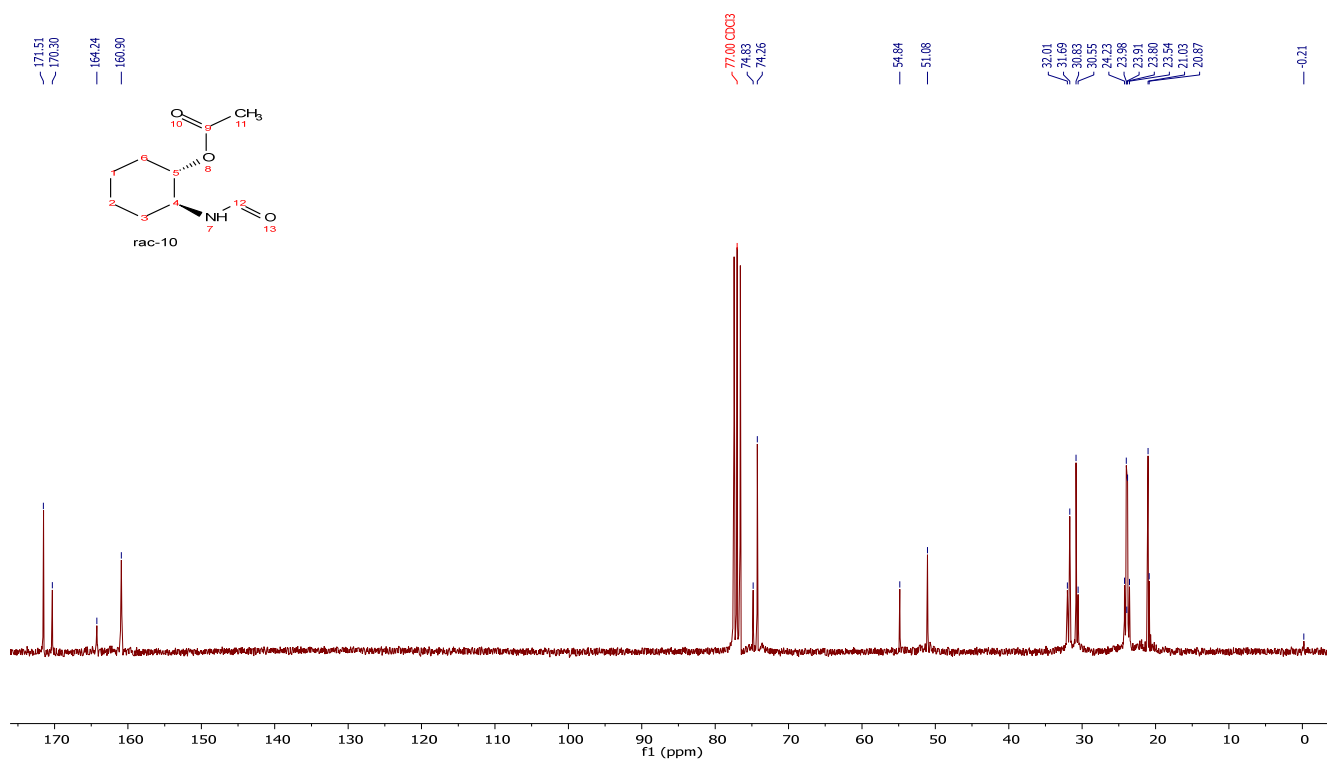

NMR spectra for *rac*-11

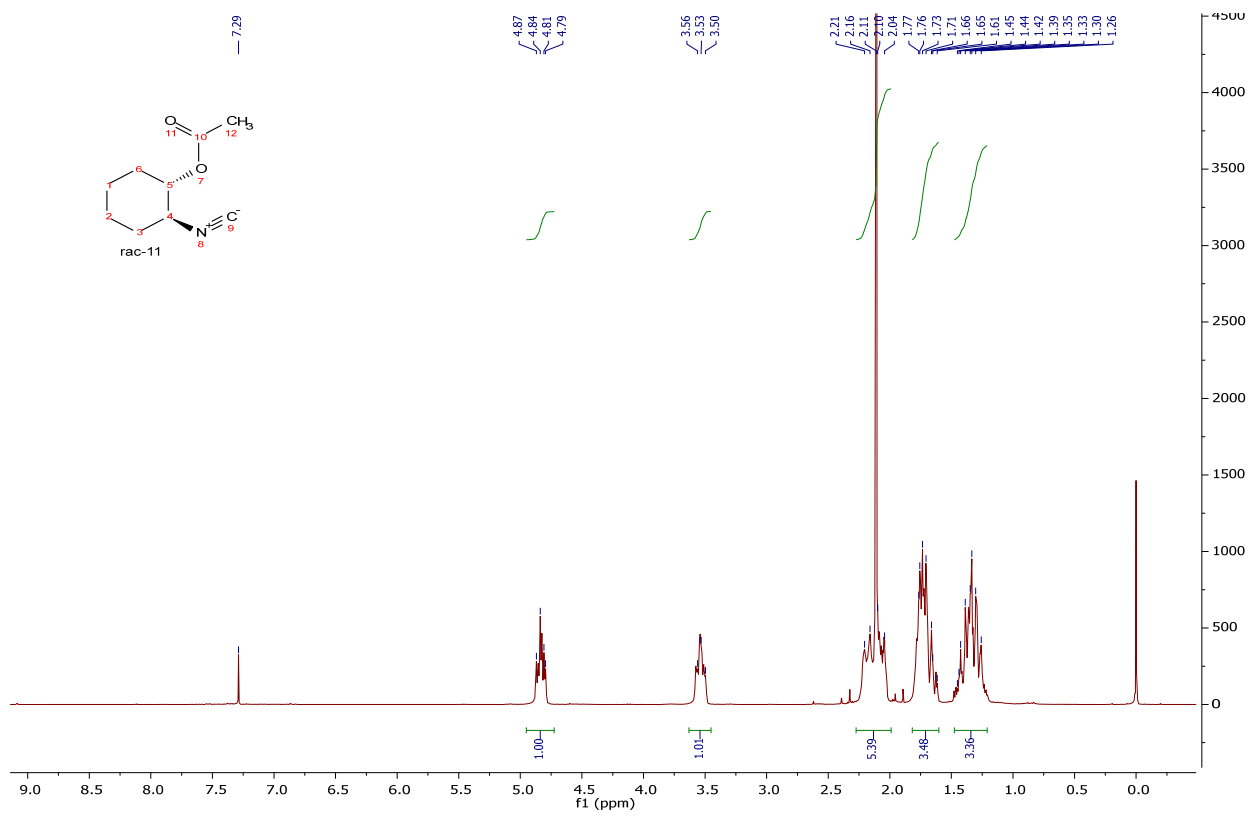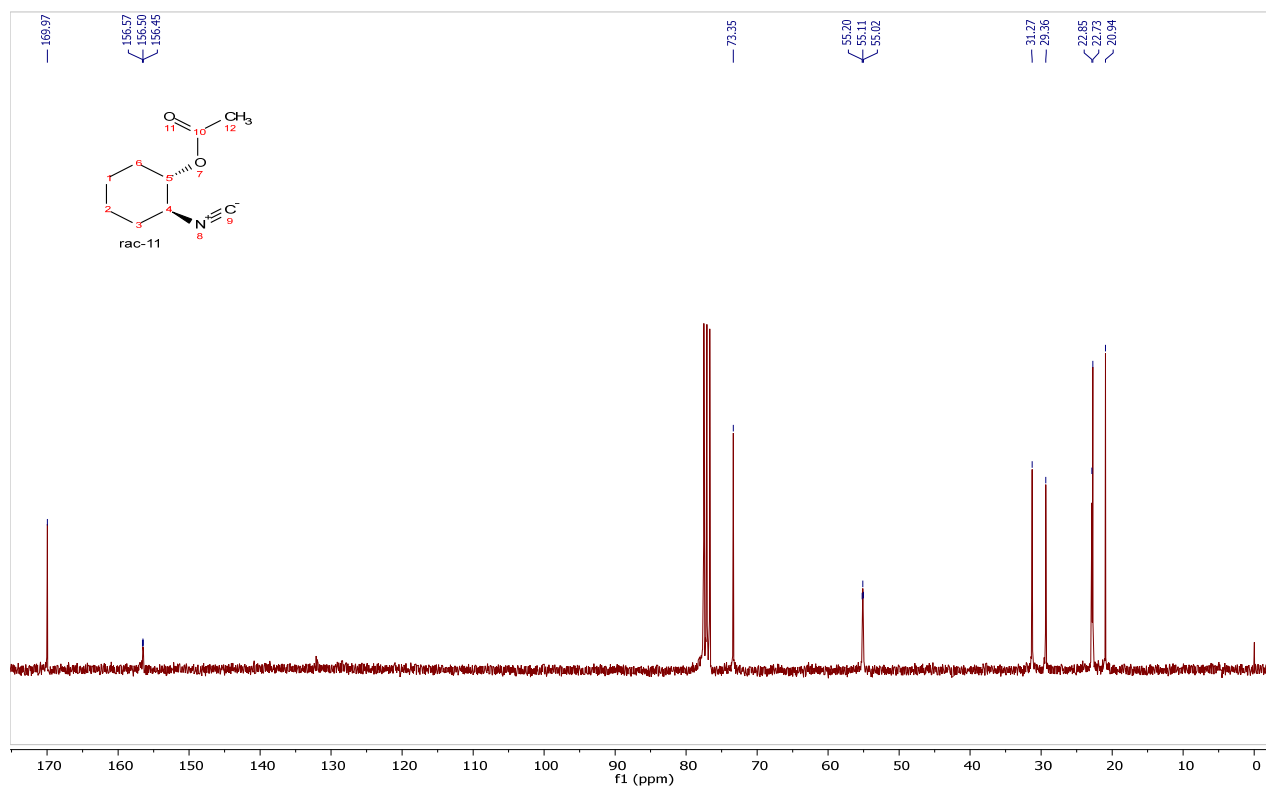

# NMR spectra for rac-14a

BC01.76.1.fid — BCV: BC01.76: CDCl3: 02/09/2013: RT: 1H,13C,DEPT135,COSY,HSQC: 500 NMR

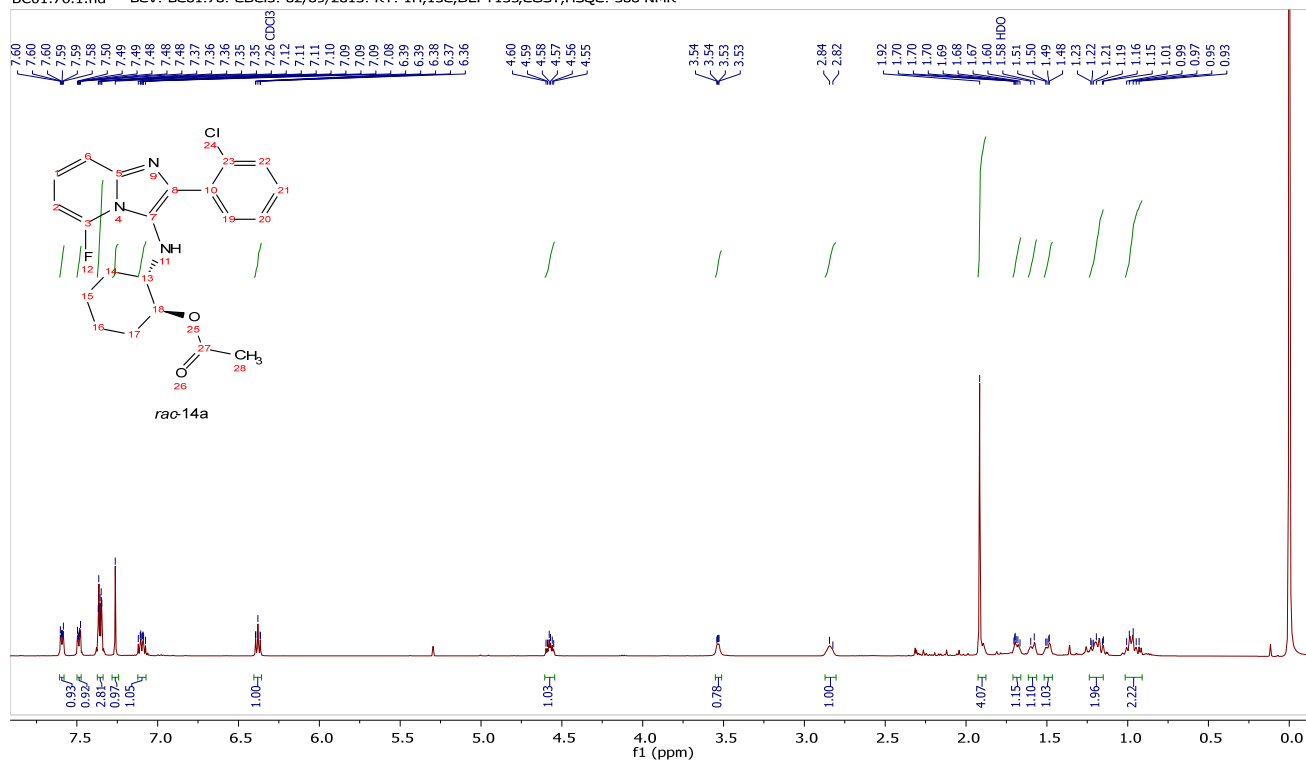

BC01.76.2.fid — BCV: BC01.76: CDCl3: 02/09/2013: RT: 1H,13C,DEPT135,COSY,HSQC: 500 NMR

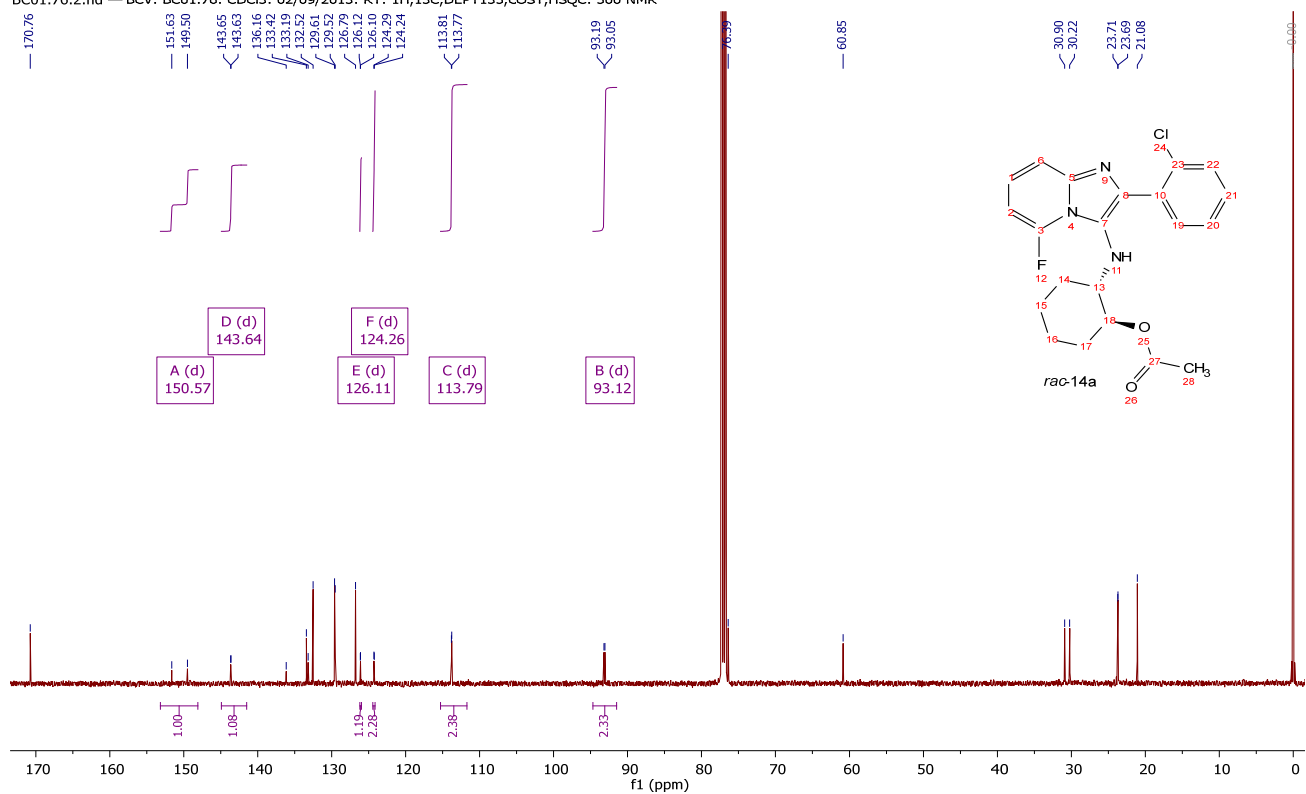

NMR spectra for rac-14b

BC01.75.1.fid — BCV: BC01.75: CDCl3: 29/08/2013: RT: 1H,13C,DEPT135,COSY,HSQC: 500

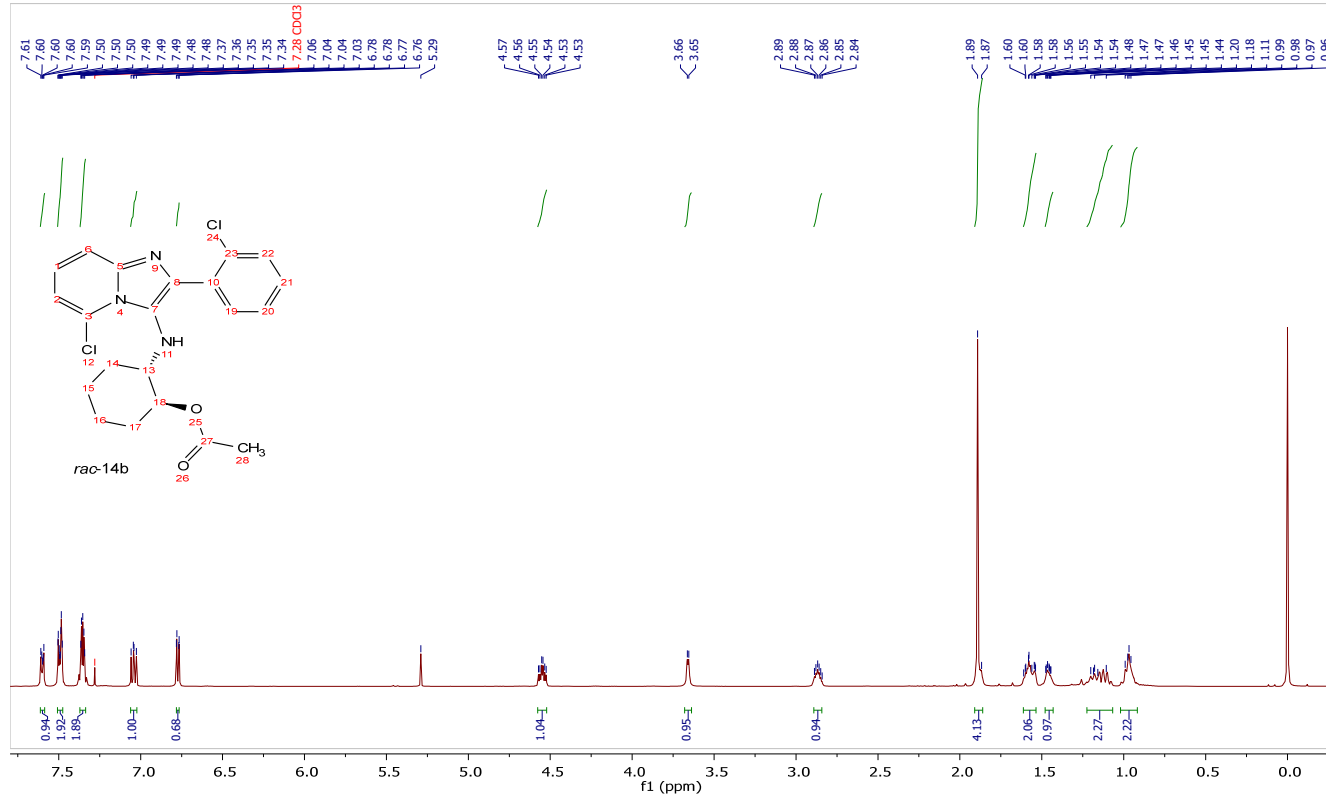

BC01.75.2.fid — BCV: BC01.75: CDCl3: 29/08/2013: RT: 1H,13C,DEPT135,COSY,HSQC: 500

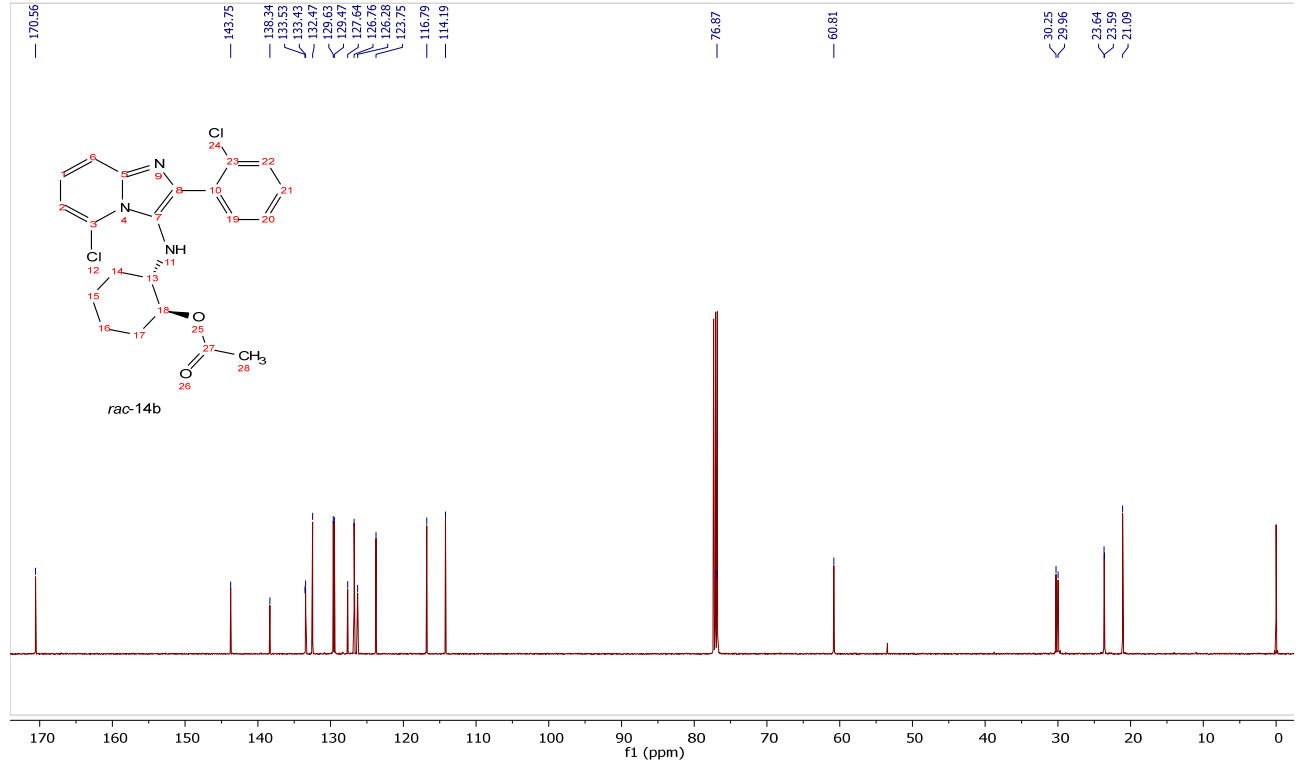

NMR spectra for *rac*-14c

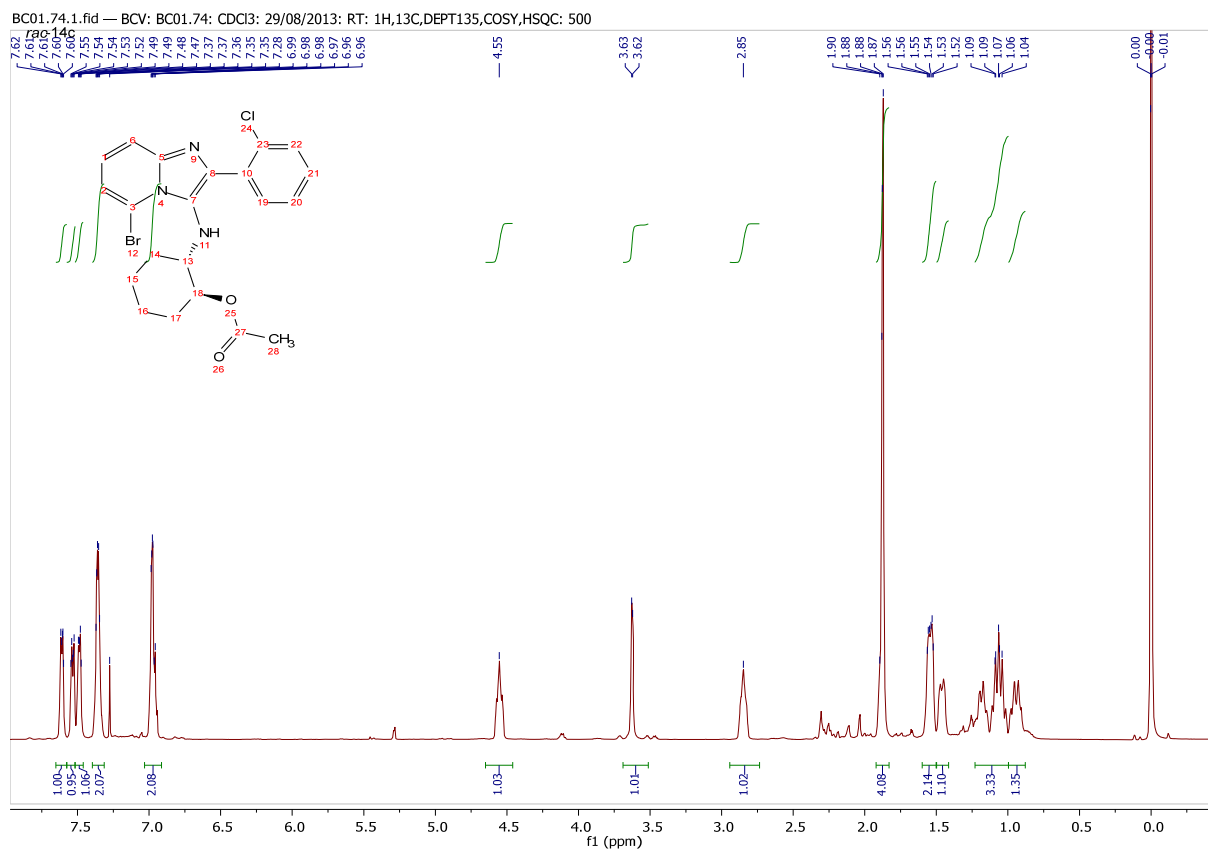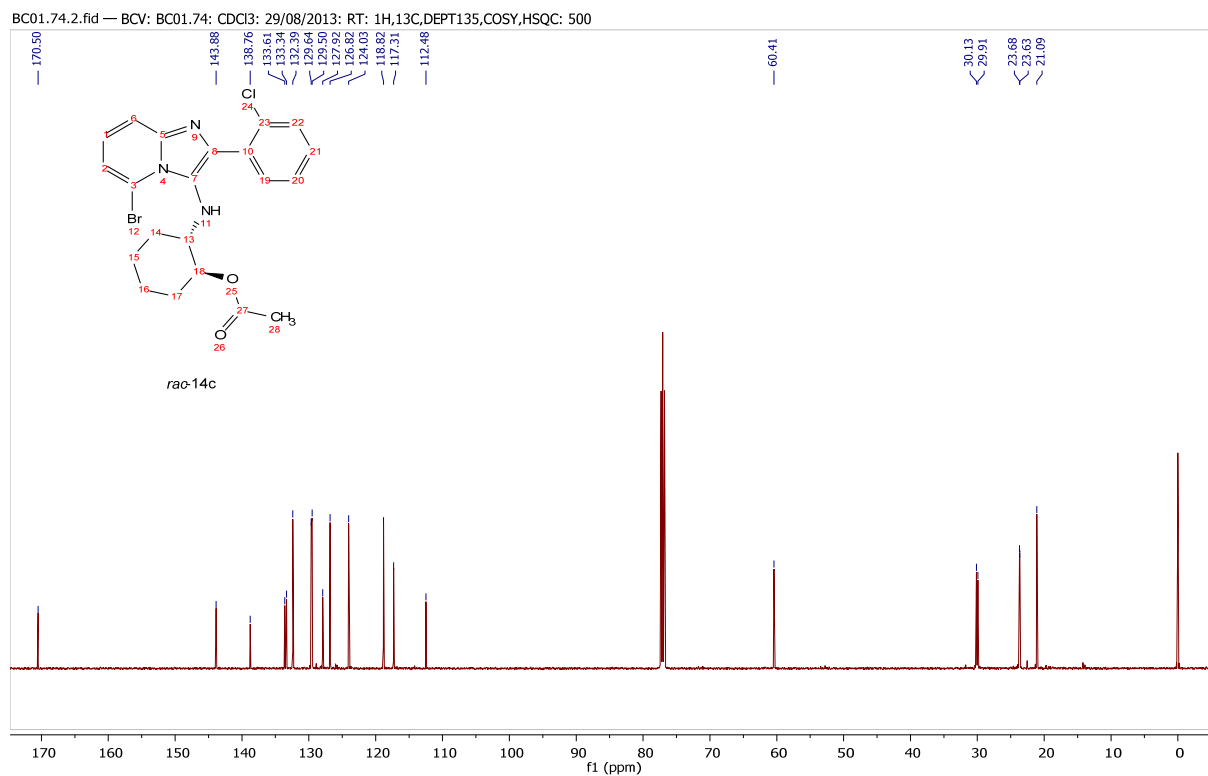

# NMR spectra for *rac*-14d

CCK-BC.81/10 — CharlesC:CCK-BC.81:CDCl3:25/10/2019:H,13C:400MHz:MLB

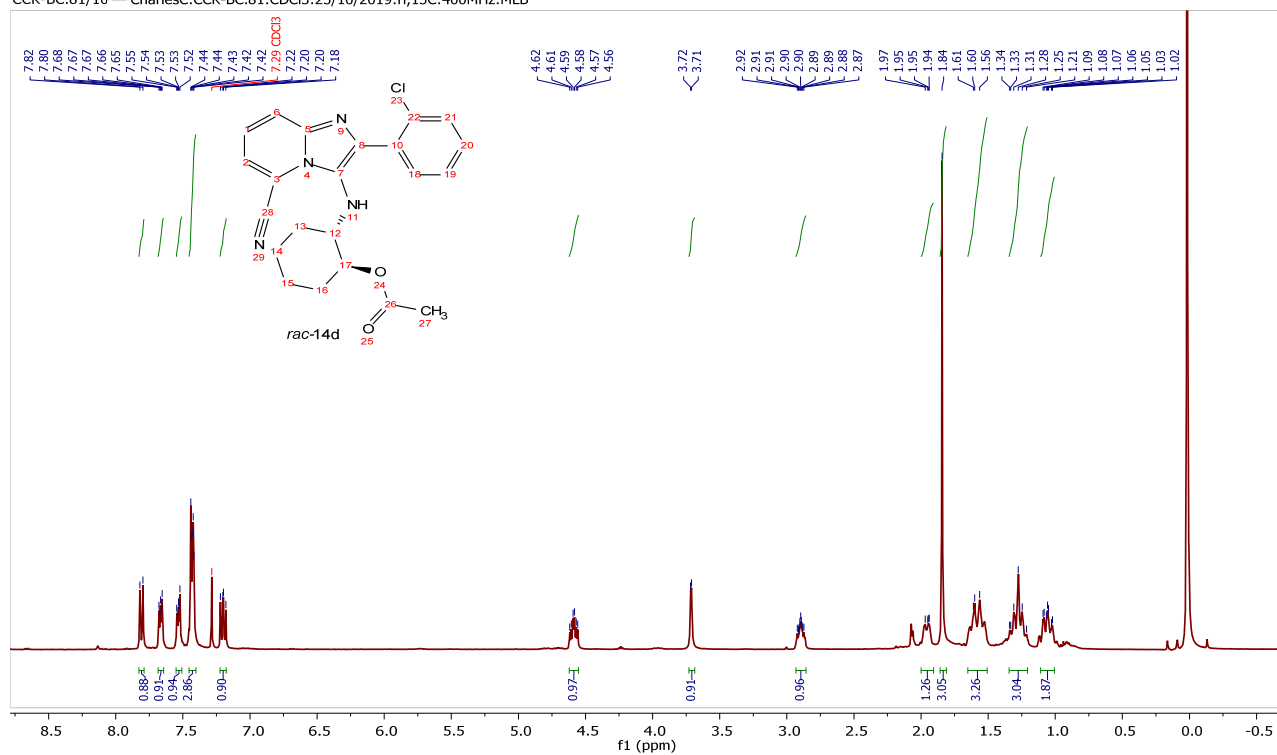

CCK-BC.81/11 — CharlesC:CCK-BC.81:CDCl3:25/10/2019:H,13C:400MHz:MLB

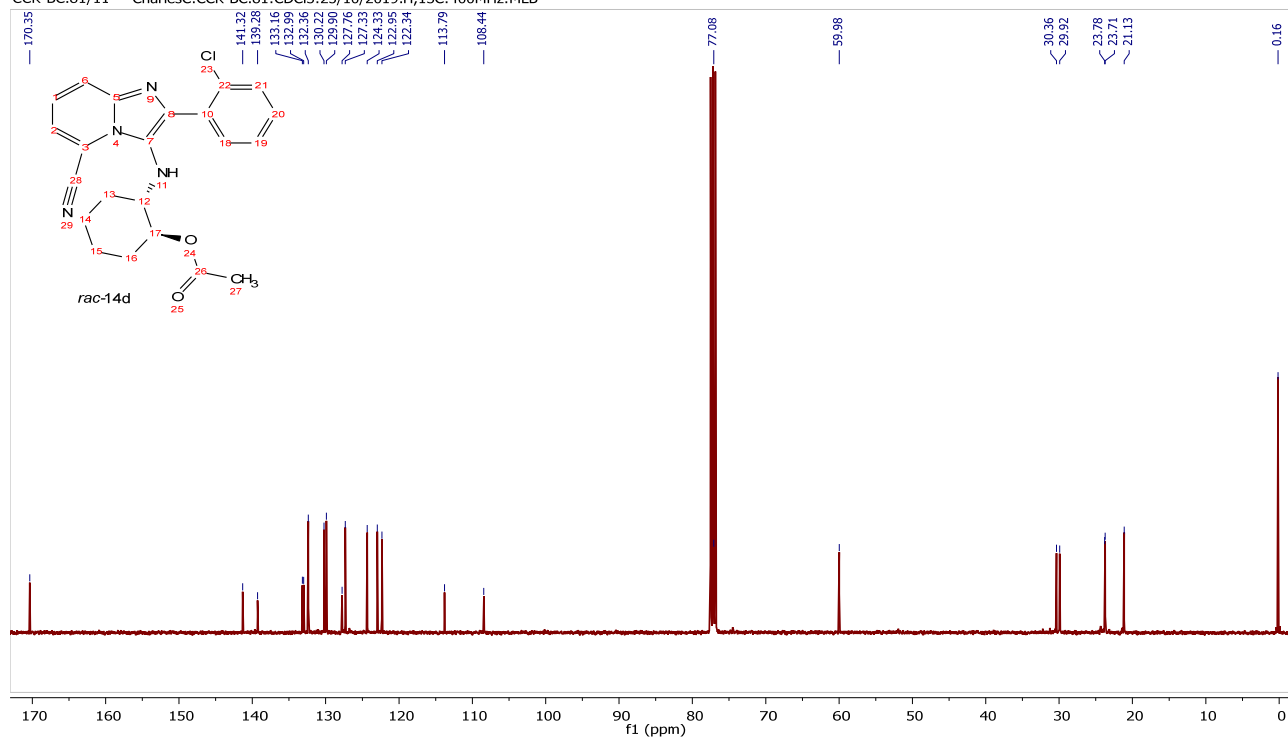

# NMR spectra for rac-16a

CCK-C1D 9-2019.1.fid —

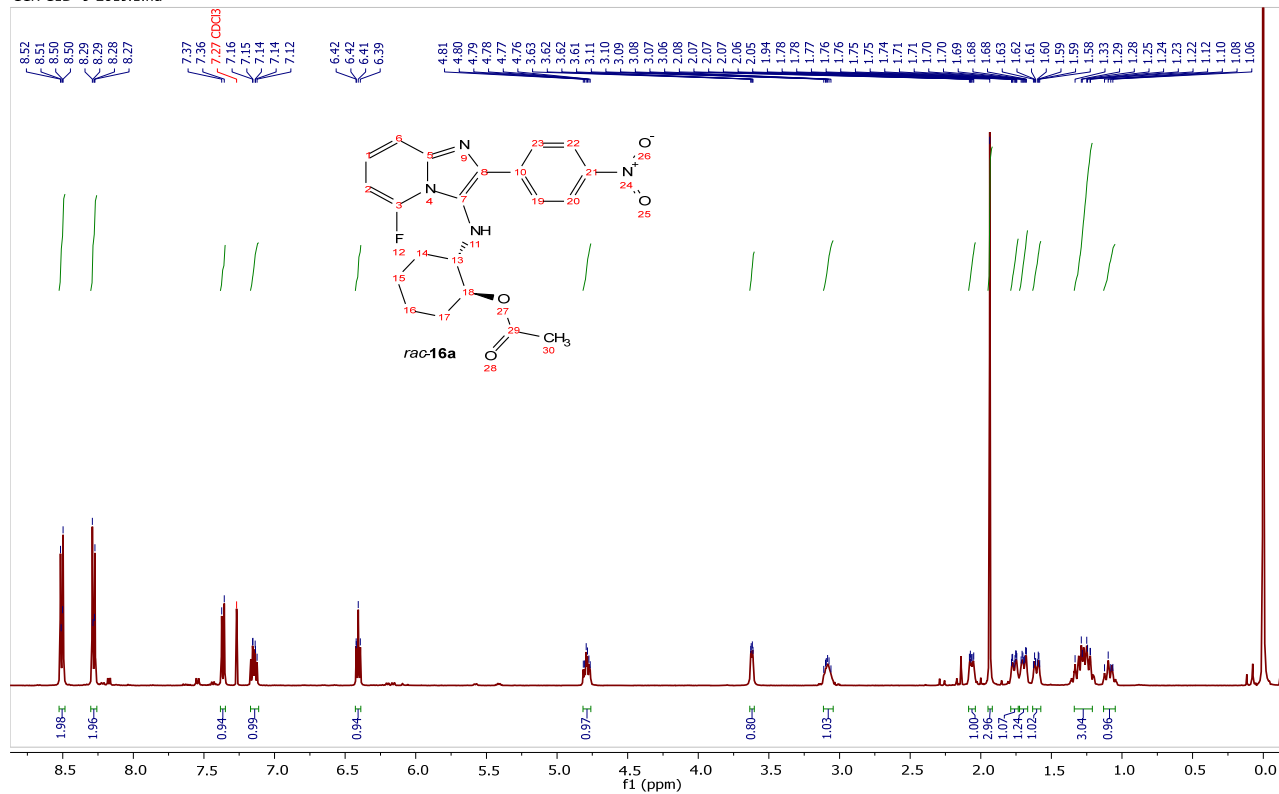

CCK-C1D 9-2019.2.fid — CharlesC:CCK-C1D 9-2019:CDCl3:RT:H,13C,COSY,DEPT,HSQC:MLB:500MHz

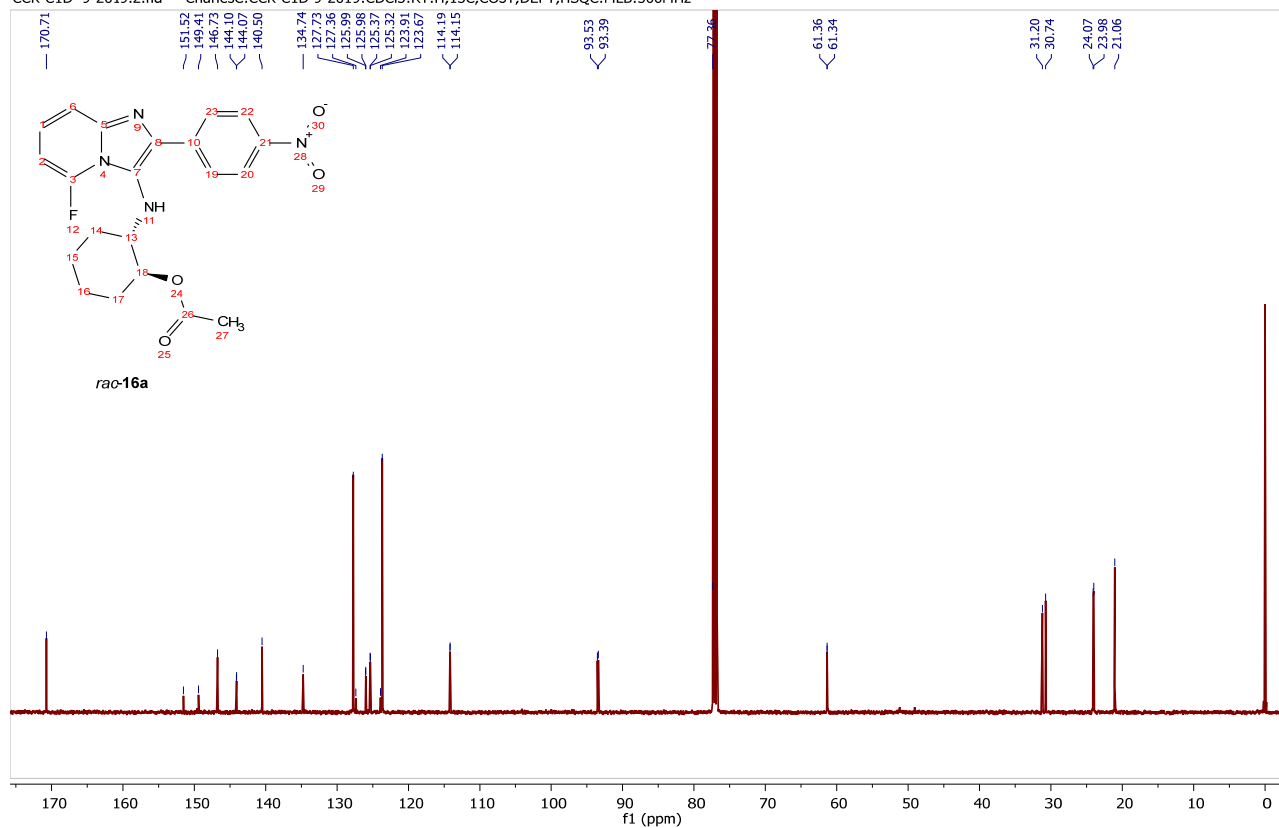



# NMR spectra for rac-16b

CCK-C2C 9-2019.1.fid — CharlesC:CCK-C2C 9-2019:CDCl3:RT:H,13C,DEPT,COSY,HSQC:MLB:500MHz

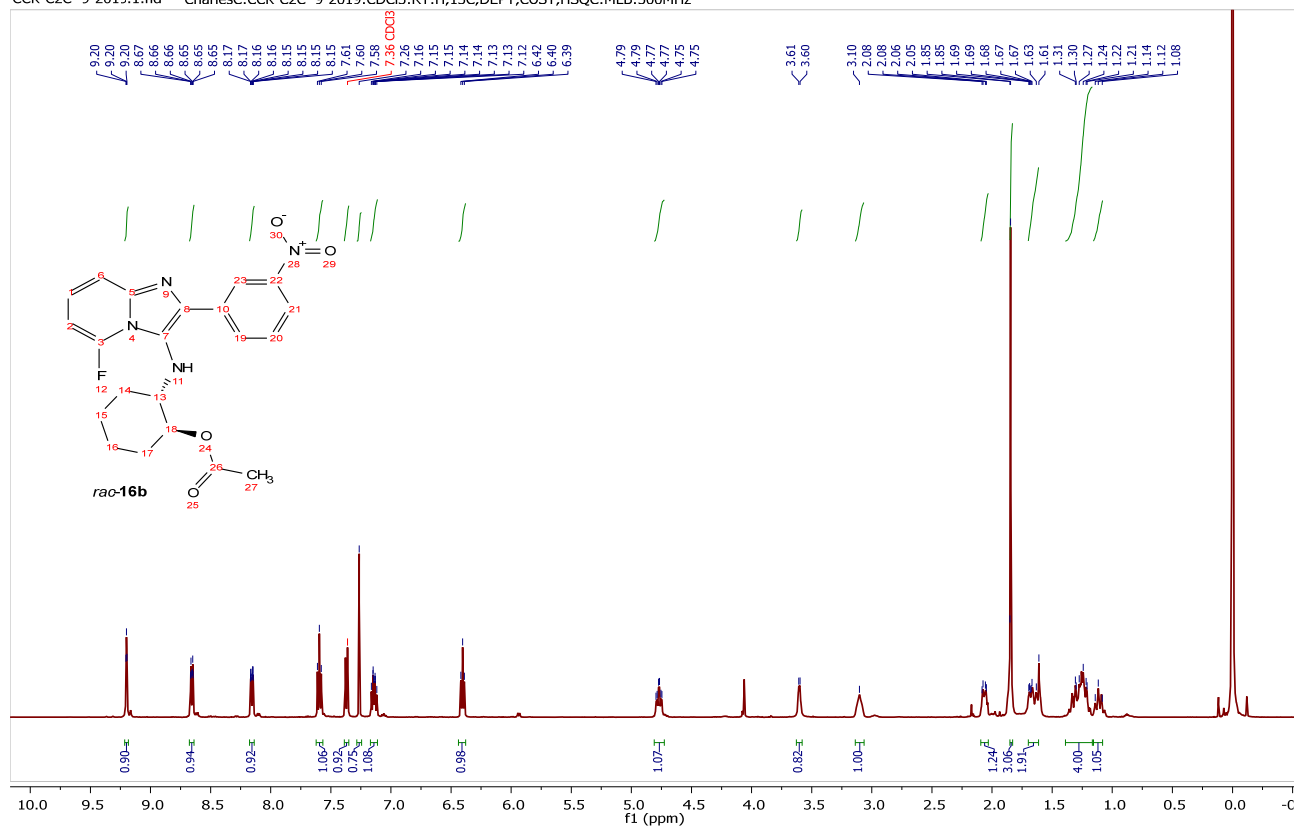

CCK-C2C 9-2019.2.fid — CharlesC:CCK-C2C 9-2019:CDCl3:RT:H,13C,DEPT,COSY,HSQC:MLB:500MHz

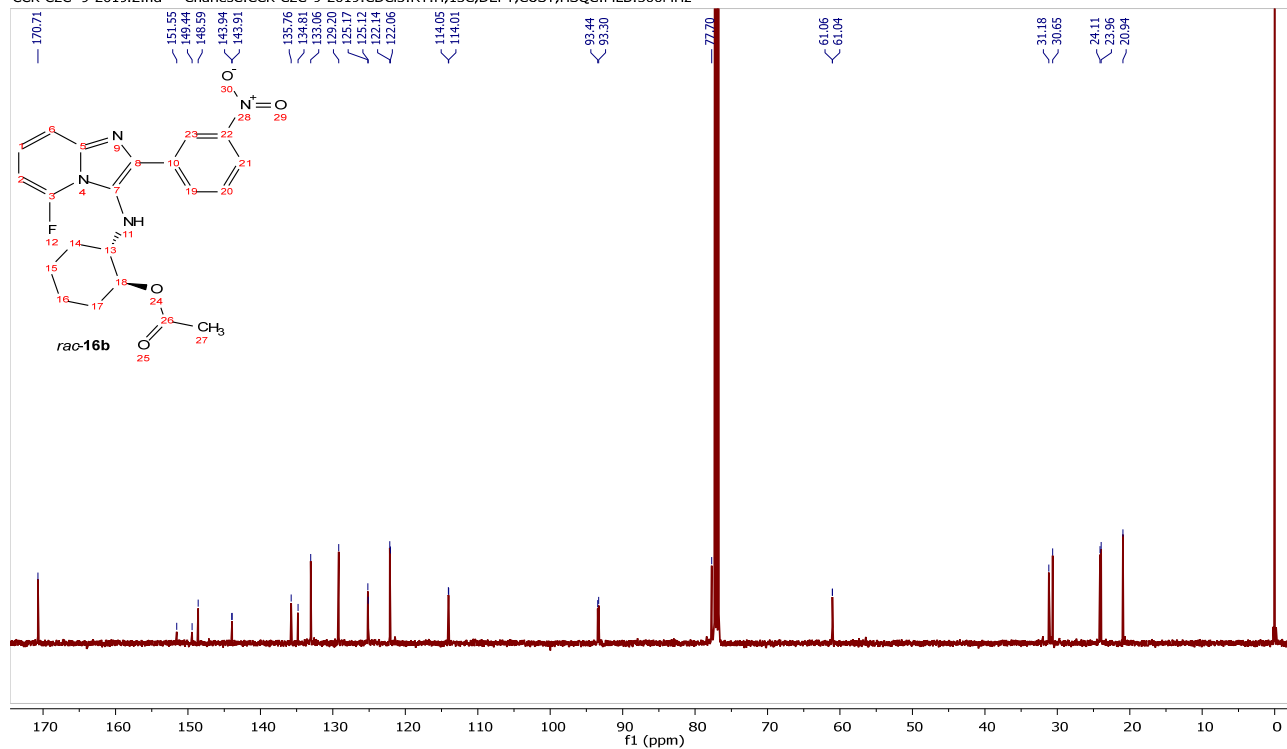

NMR spectra for *rac-16c*

CCK-C4C 9-2019.1.fid — CharlesC:CCK-C4C 9-2019:CDCl3:4/9/2019:300K:H,13C,COSY,DEPT,HSQC:MLB:500MHz

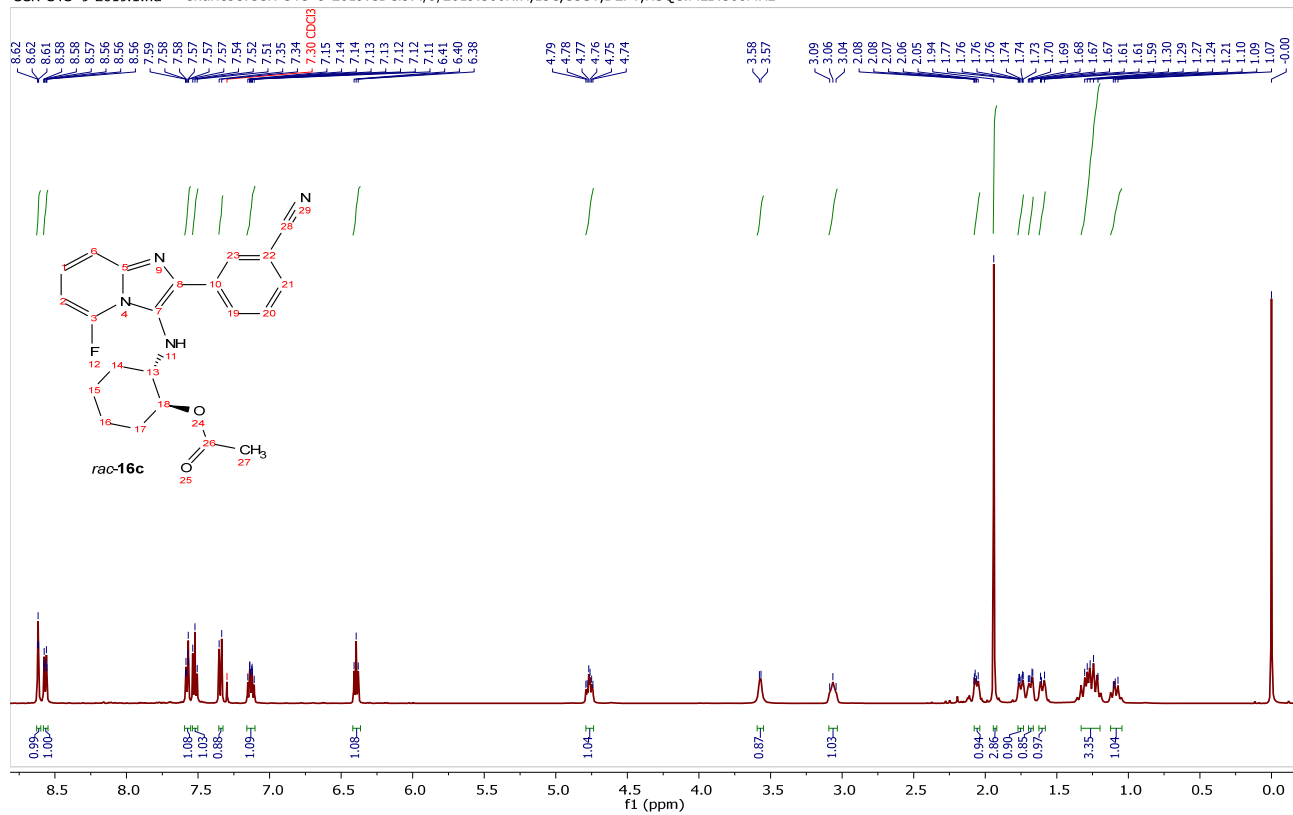

CCK-C4C 9-2019.2.fid — CharlesC:CCK-C4C 9-2019:CDCl3:4/9/2019:300K:H,13C,COSY,DEPT,HSQC:MLB:500MHz

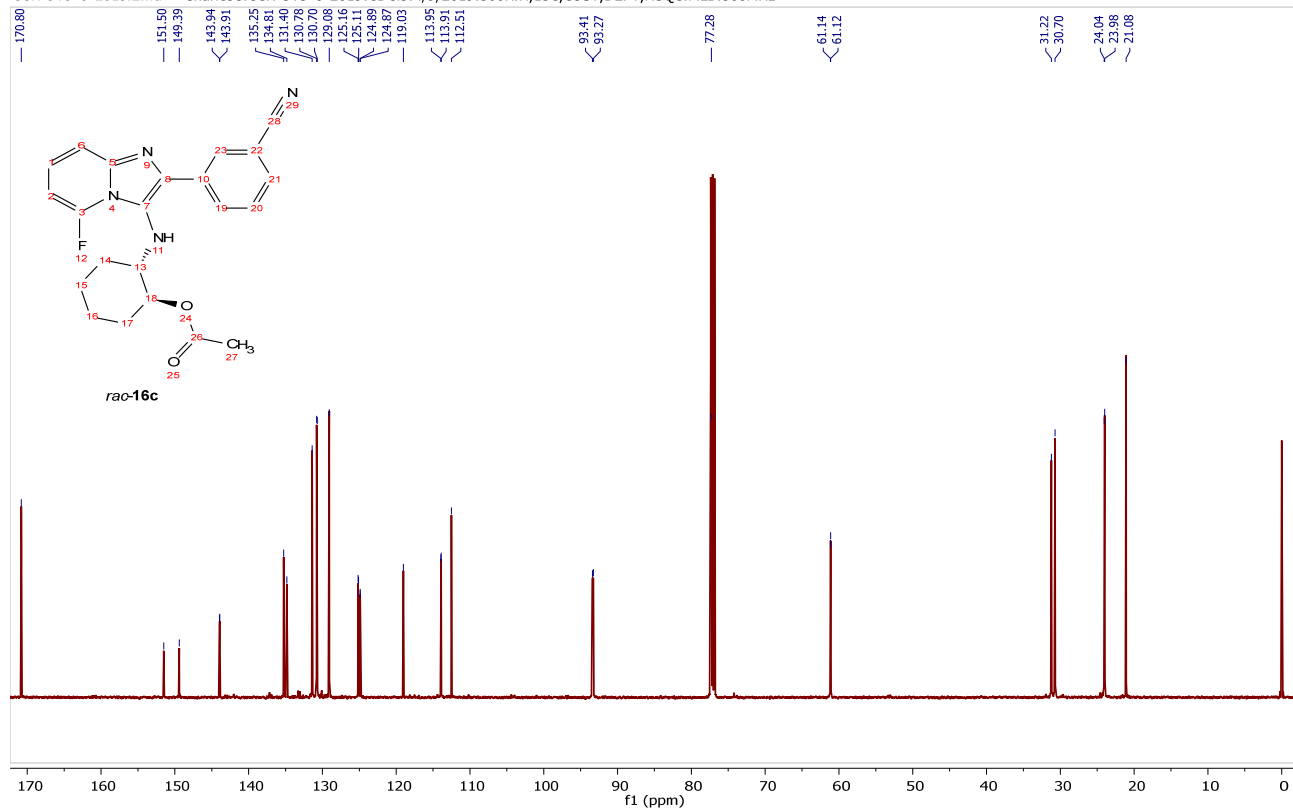

### NMR spectra for *rac*-16d

CCK-C3C 9-2019.1.fid — CharlesC:CCK-C3C 9-2019:CDCl3:RT:H,13C,DEPT,COSY,HSQC:MLB:500MHz

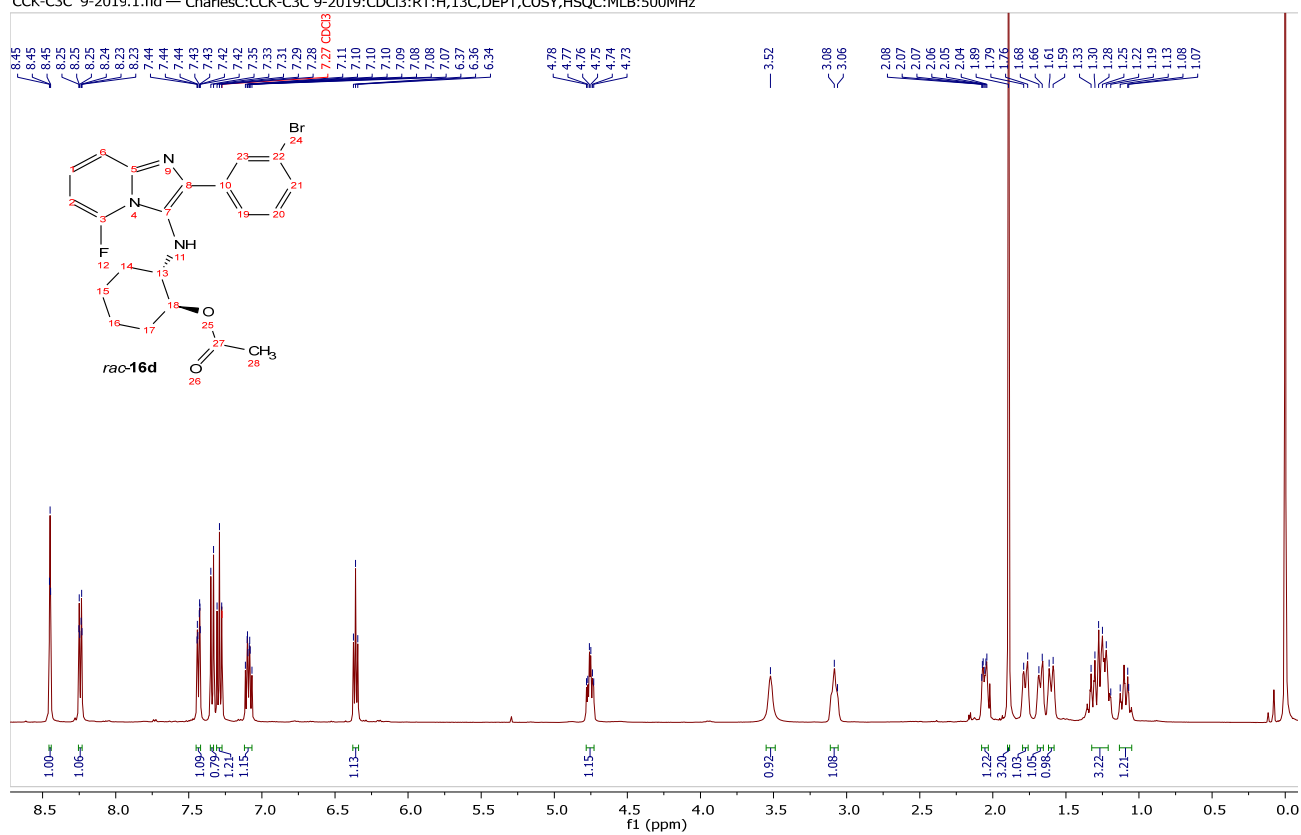

CCK-C3C 9-2019.2.fid — CharlesC:CCK-C3C 9-2019:CDCl3:RT:H,13C,DEPT,COSY,HSQC:MLB:500MHz

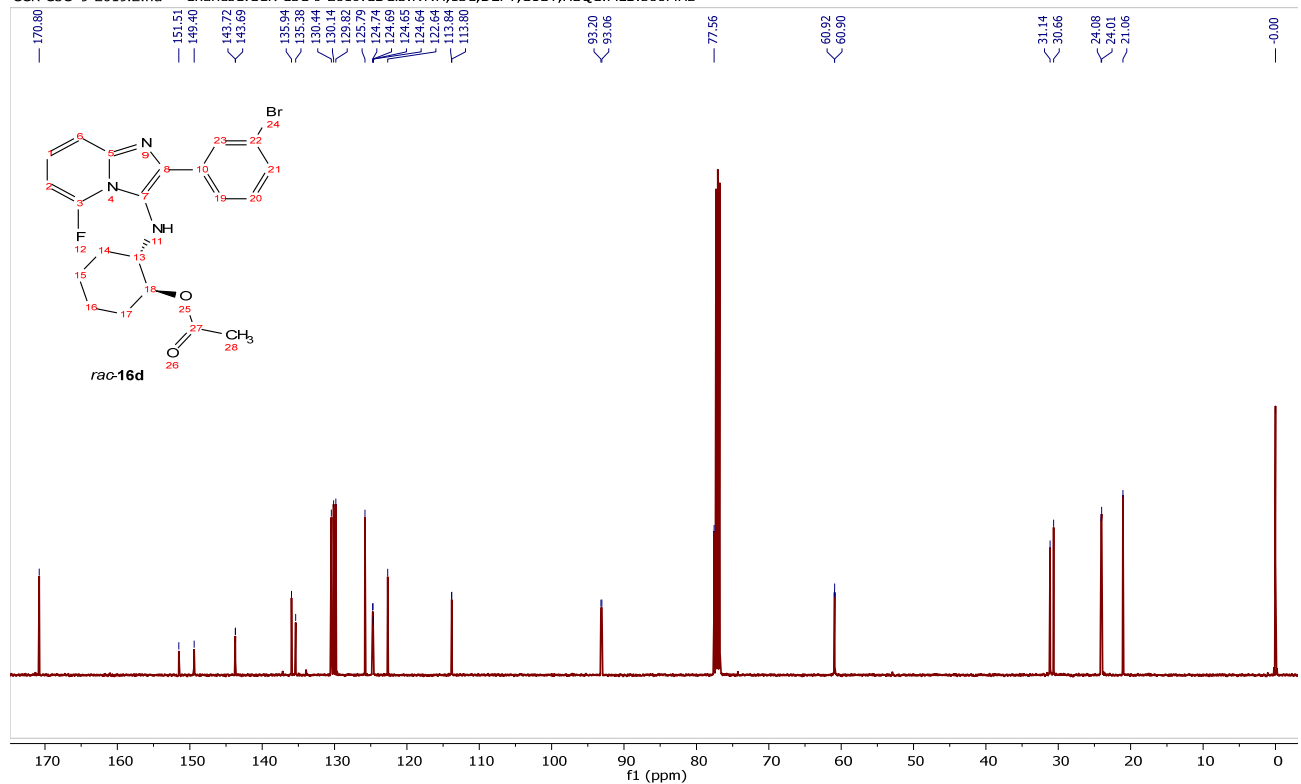

NMR spectra for *rac-7b*

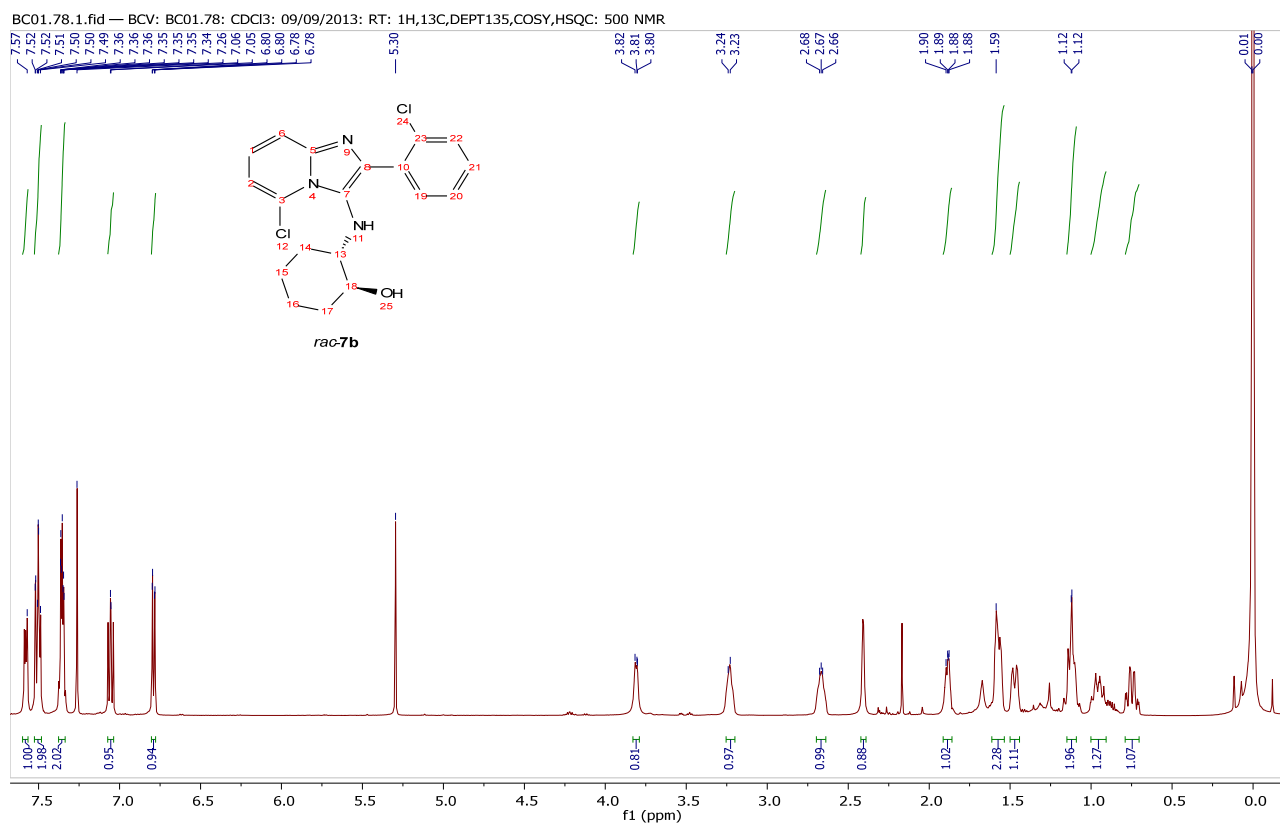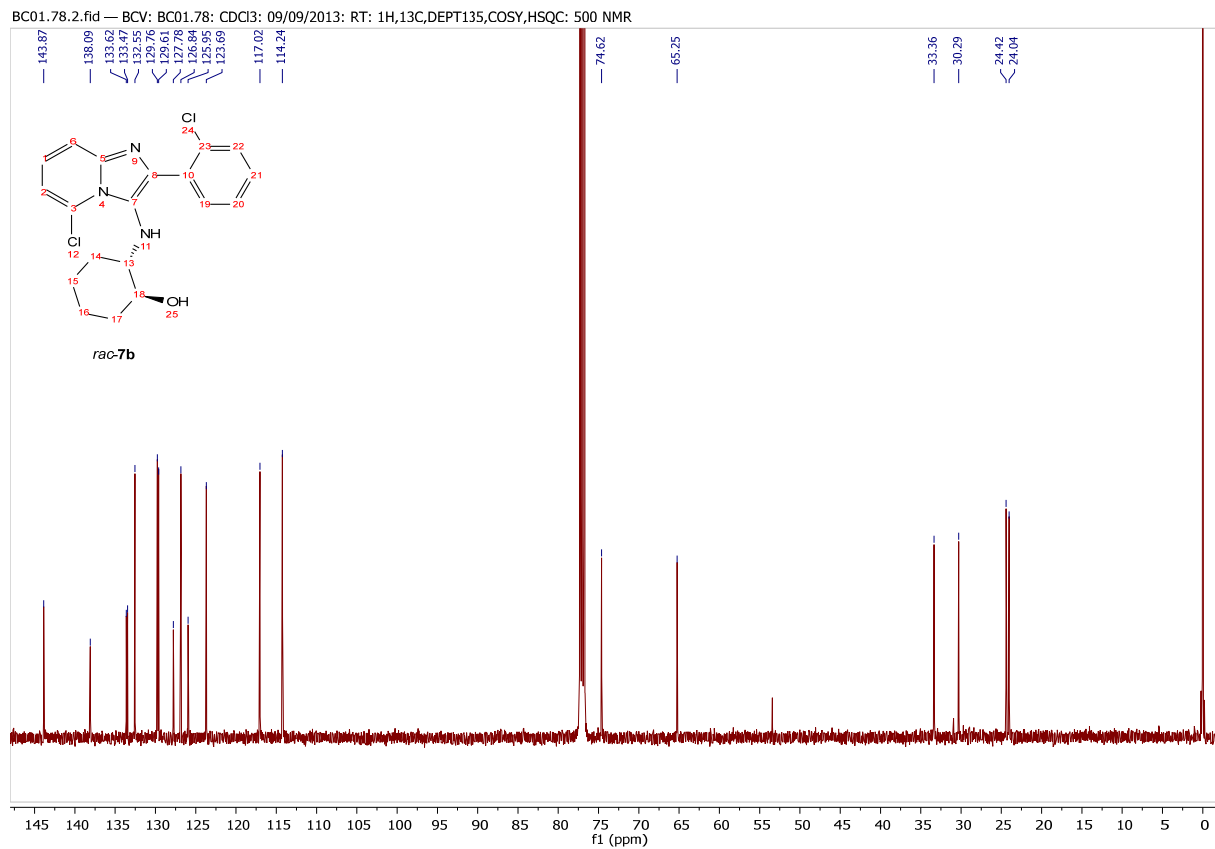

NMR spectra for *rac-7c*

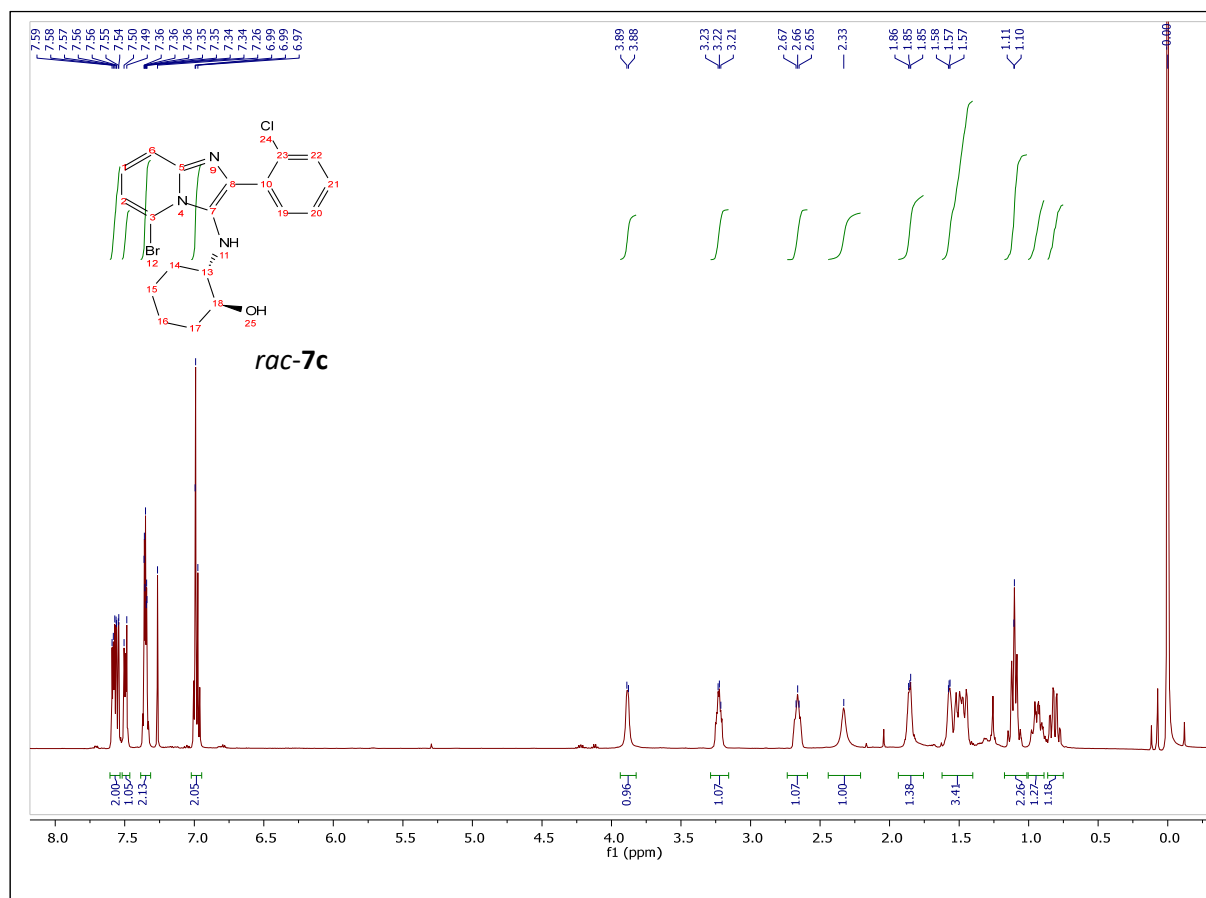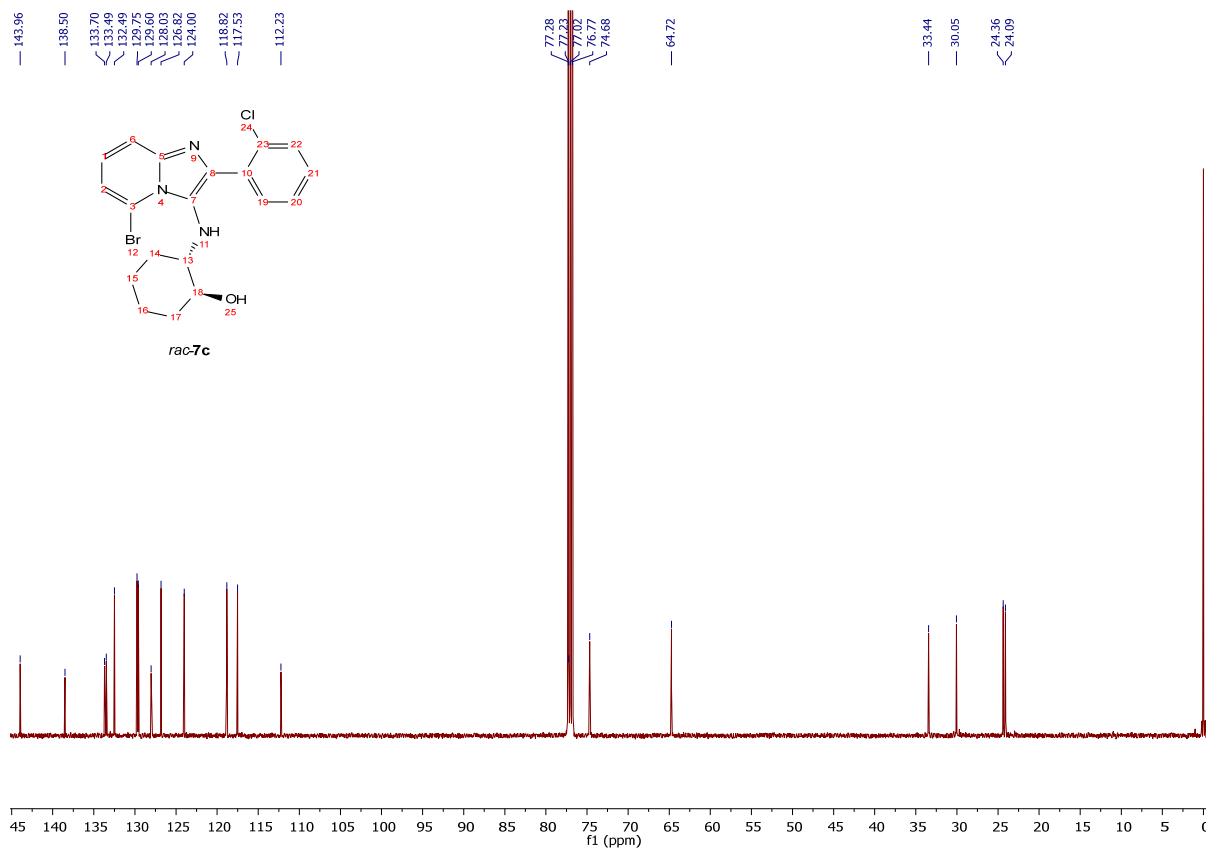

NMR spectra for *rac-7e*

CCK-BC.84/10 — CharlesC:CCK-BC.84:DMSO:24/10/2019: H,13C:400MHz:MLB

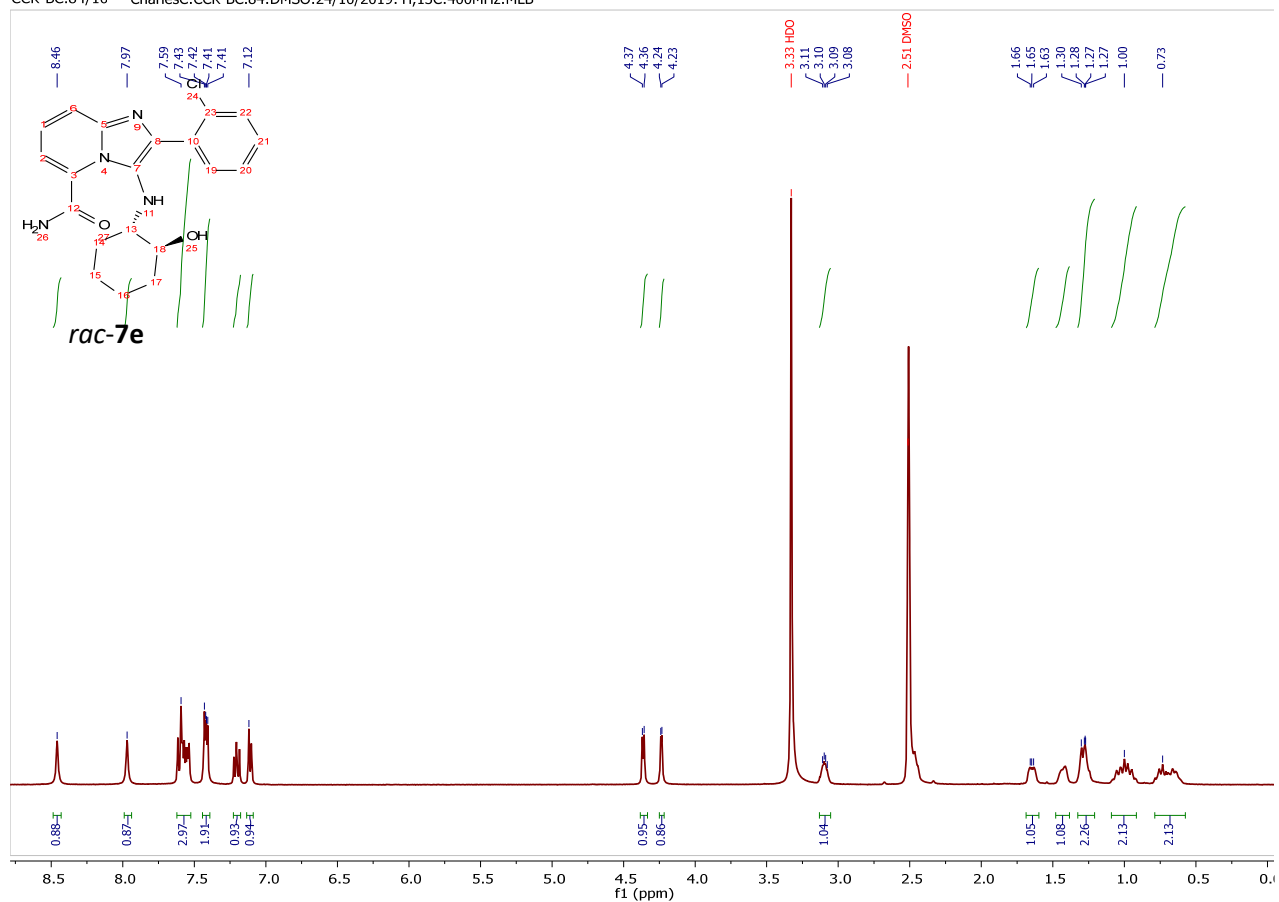

CCK-BC.84/11 — CharlesC:CCK-BC.84:DMSO:24/10/2019: H,13C:400MHz:MLB

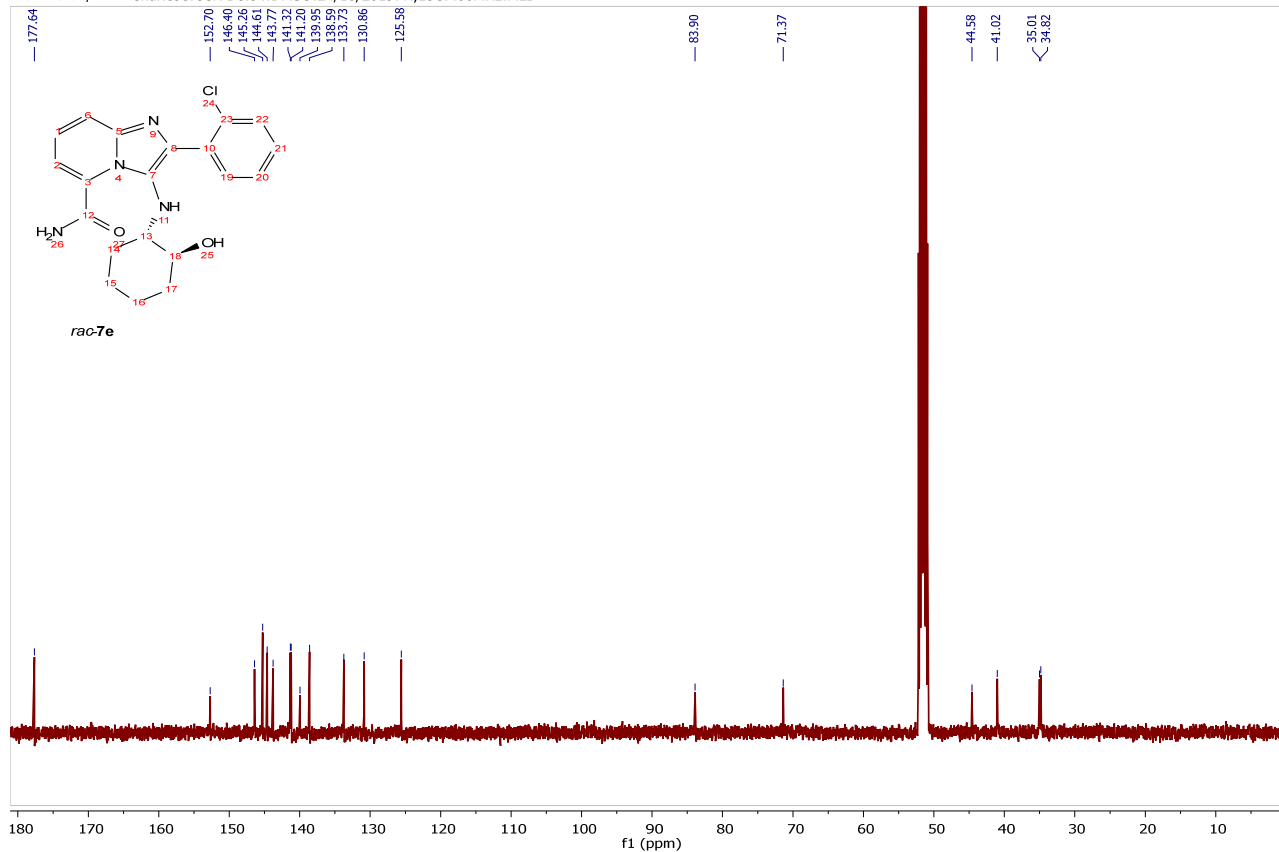

NMR spectra for *rac-7f*

BC01.79 C.1.fid — BCV: BC01.79 C: CDCl<sub>3</sub>: 09/09/2013: RT: 1H,13C,DEPT135,COSY,HSQC: 500 NMR

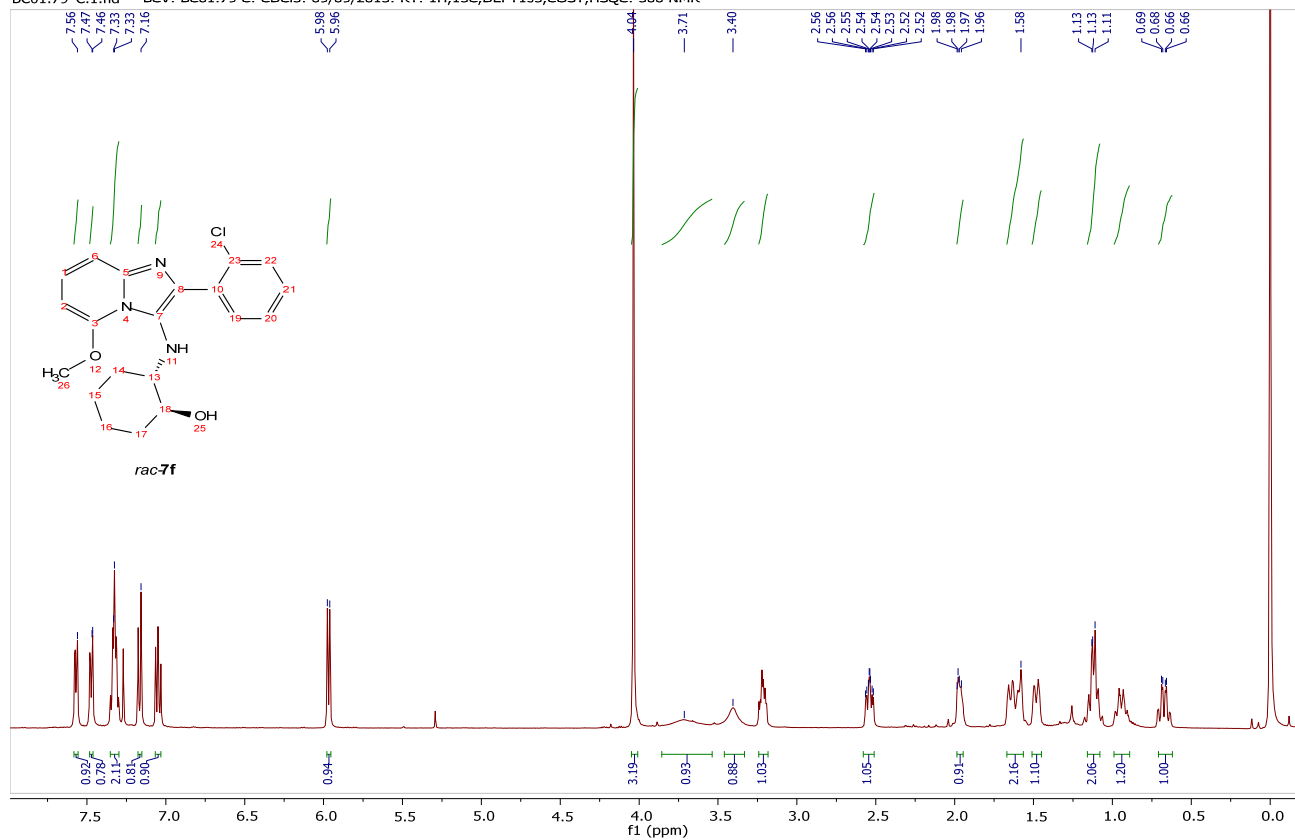

BC01.79 C.2.fid — BCV: BC01.79 C: CDCl<sub>3</sub>: 09/09/2013: RT: 1H,13C,DEPT135,COSY,HSQC: 500 NMR

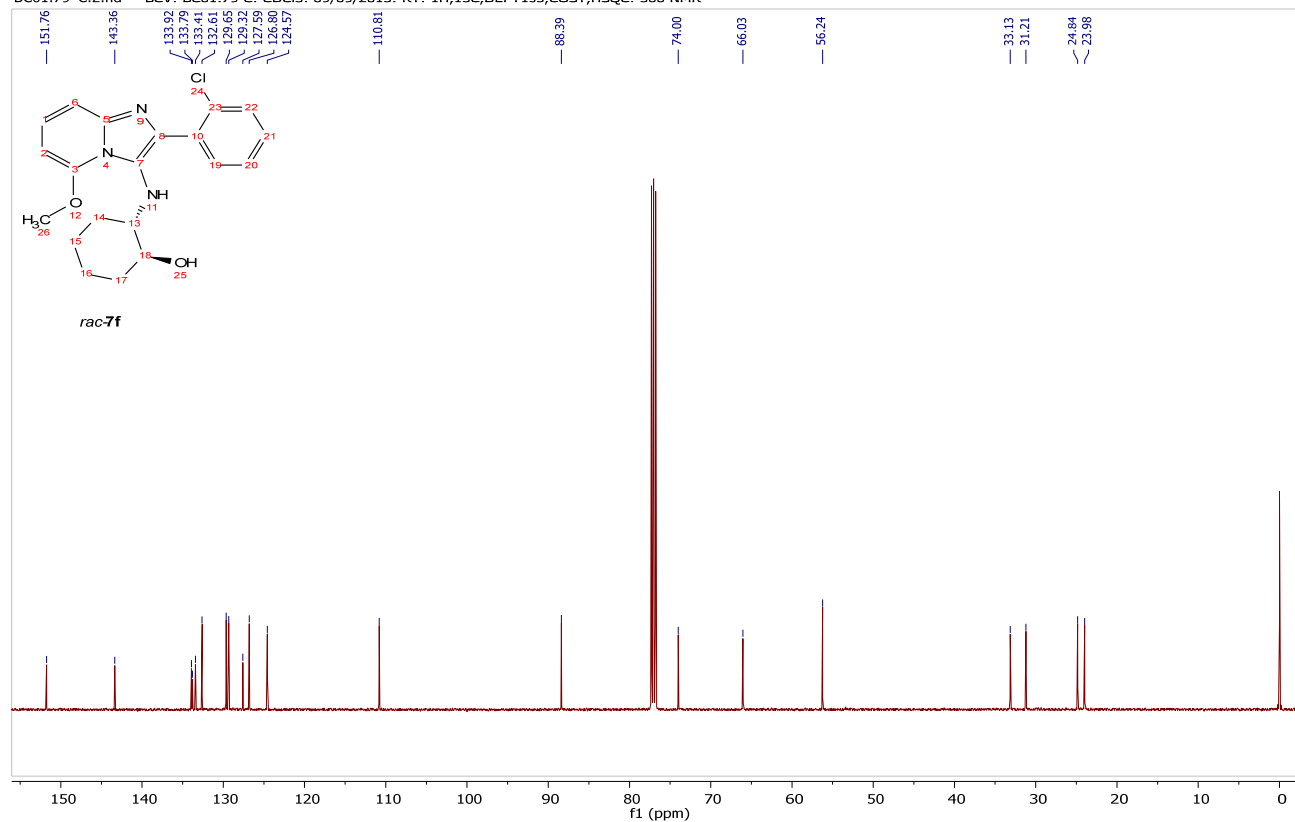

# NMR spectra for rac-15

BC01.76-2 A.1.fid — BCV: BC01.76-2 A: CDCl3: 03/09/2013: RT: 1H,13C,DEPT135,COSY,HSQC: 500 NMR

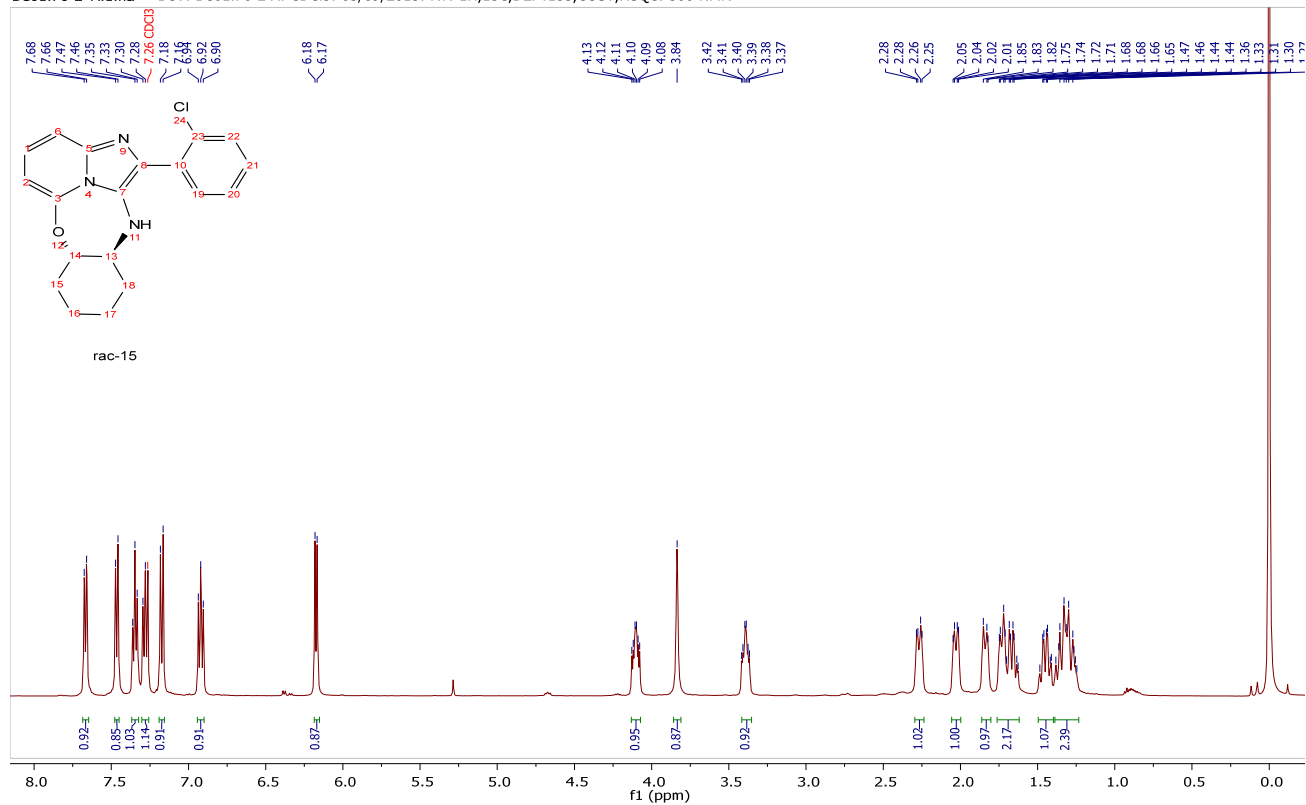

BC01.76-2 A.3.fid — BCV: BC01.76-2 A: CDCl3: 03/09/2013: RT: 1H,13C,DEPT135,COSY,HSQC: 500 NMR

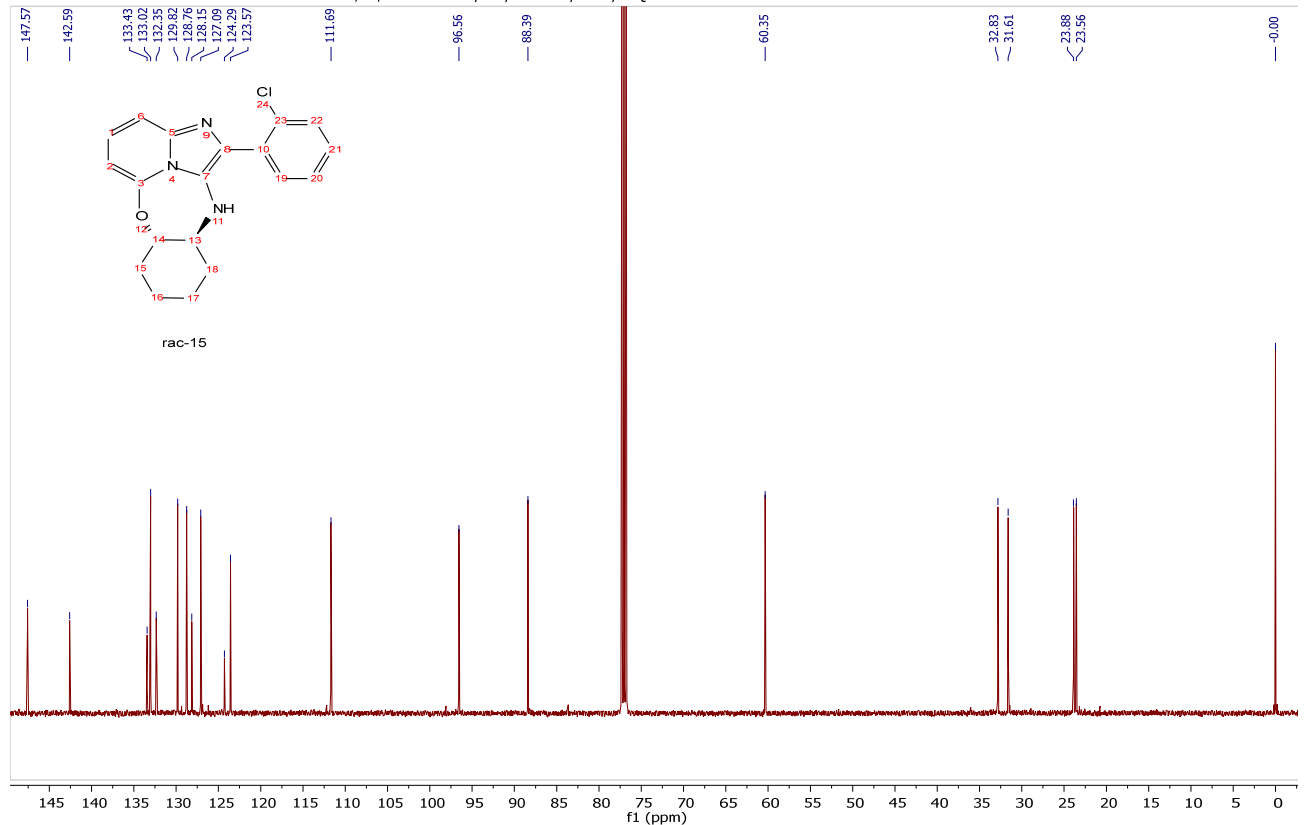



NMR spectra for 17a

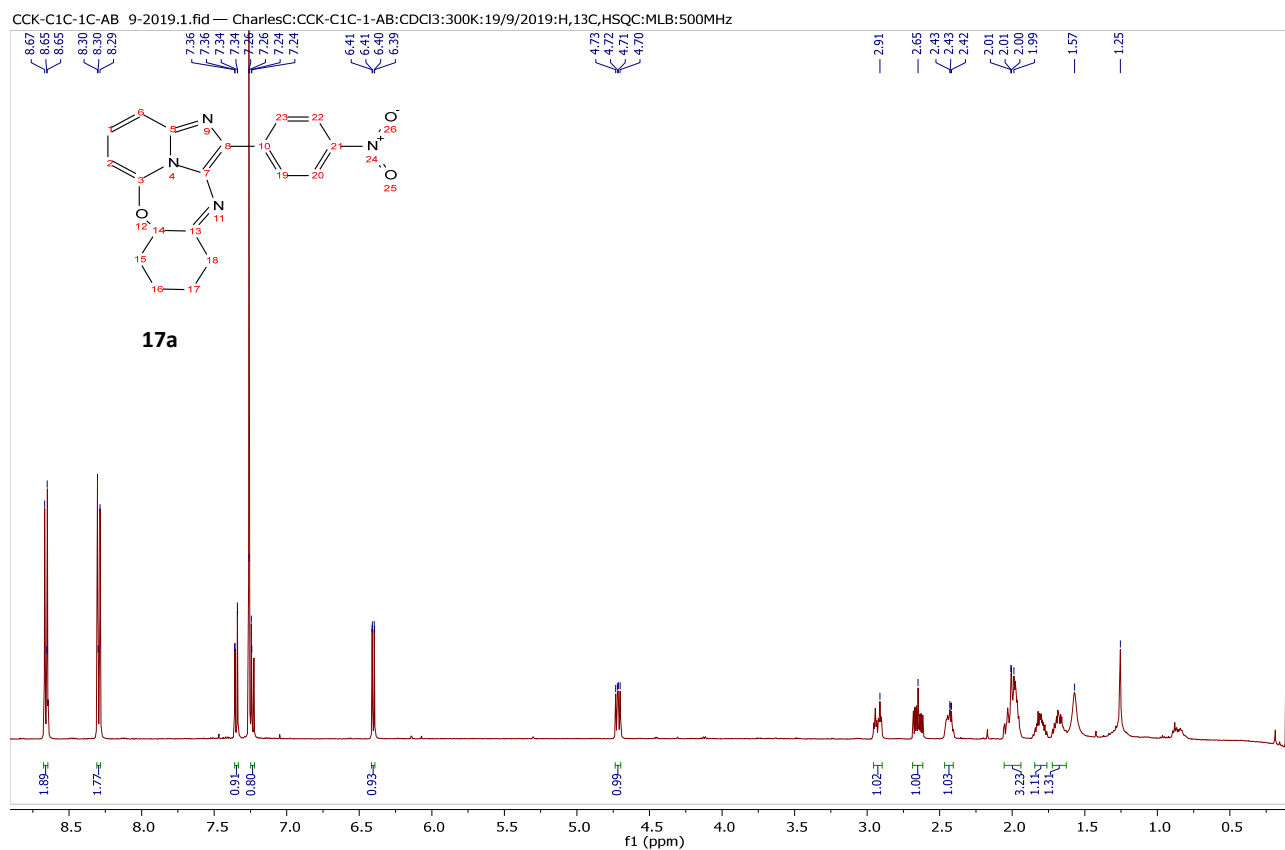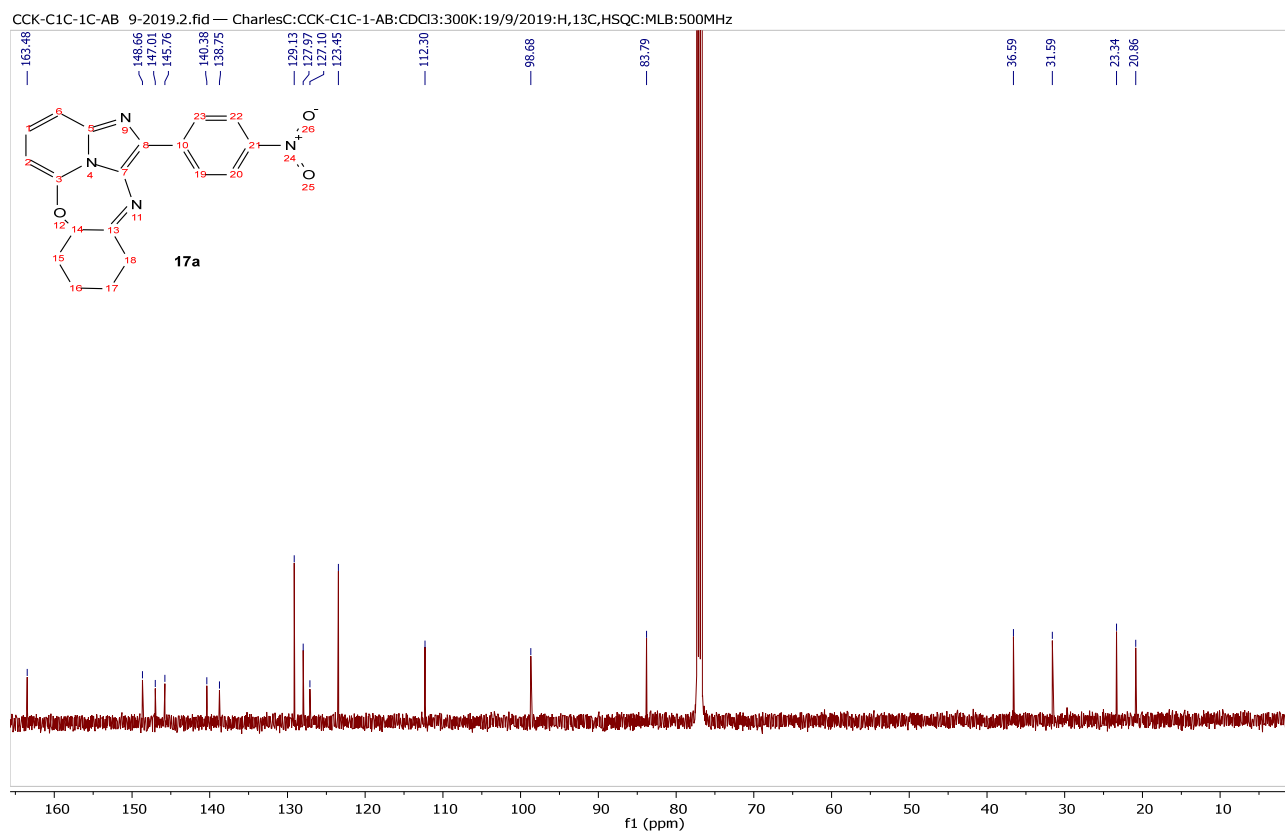

# NMR spectra for 17b

CCK-C2C-1 9-2019.10.fid — CharlesC:CCK-C2C-1 9-2019:CDCl3:1/10/2019:300K:1H,13C,DEPT,HSQC:MLB:400MHz

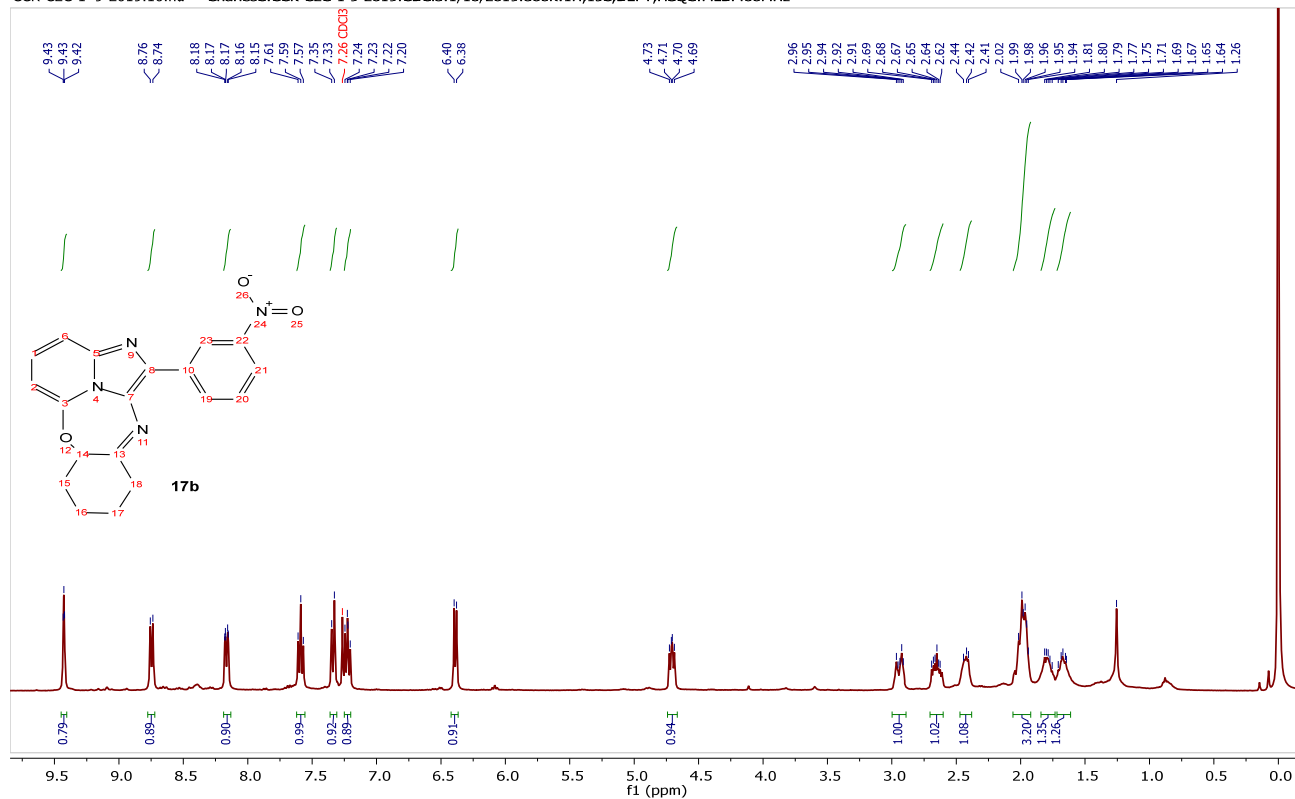

CCK-C2C-1 9-2019.11.fid — CharlesC:CCK-C2C-1 9-2019:CDCl3:1/10/2019:300K:1H,13C,DEPT,HSQC:MLB:400MHz

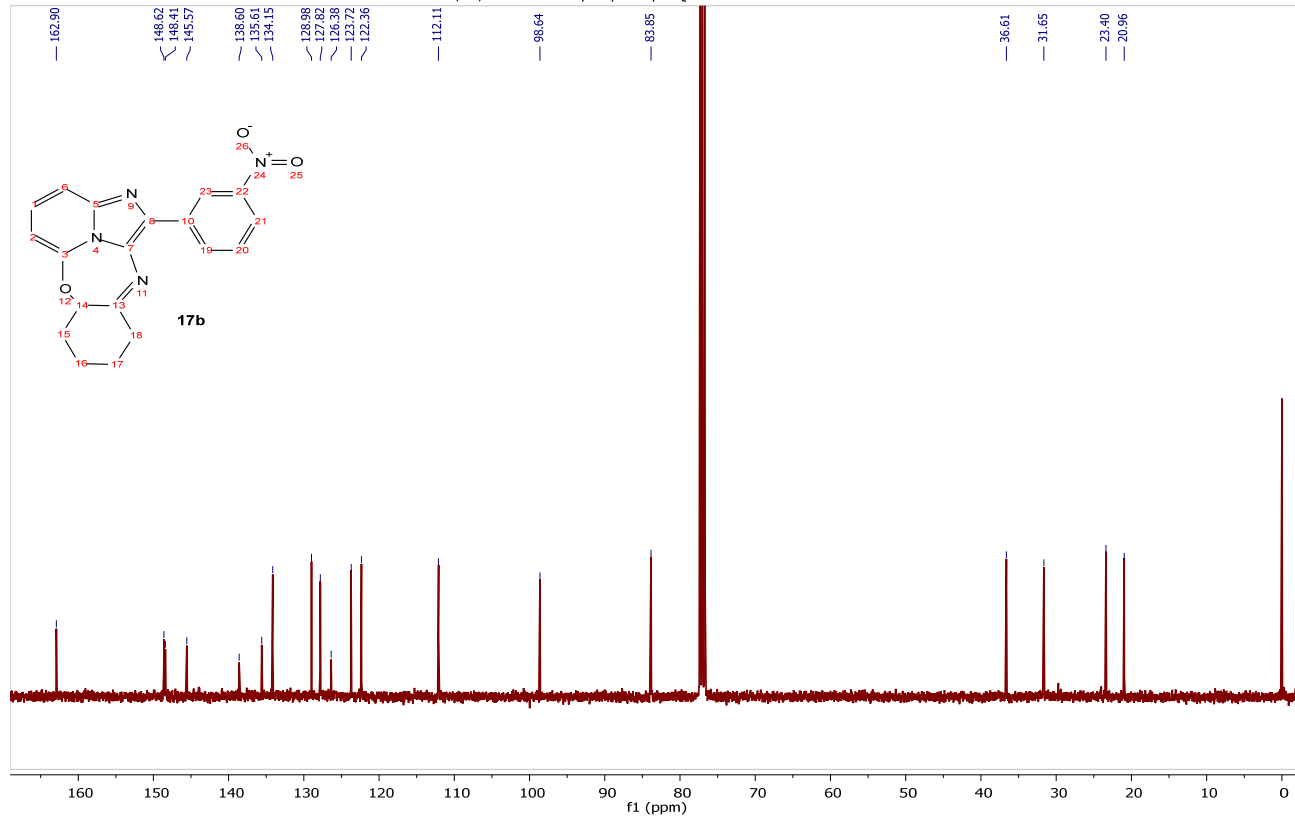

NMR spectra for 17c

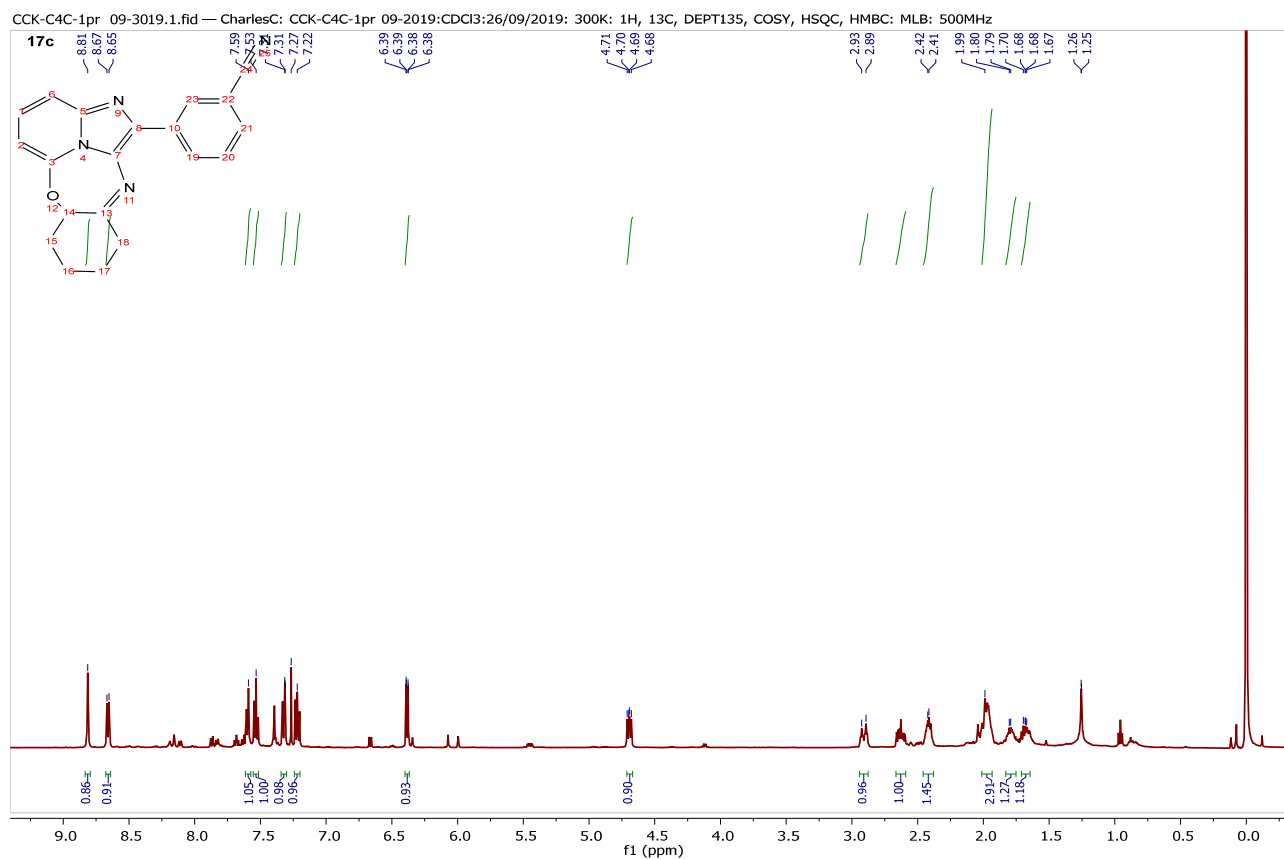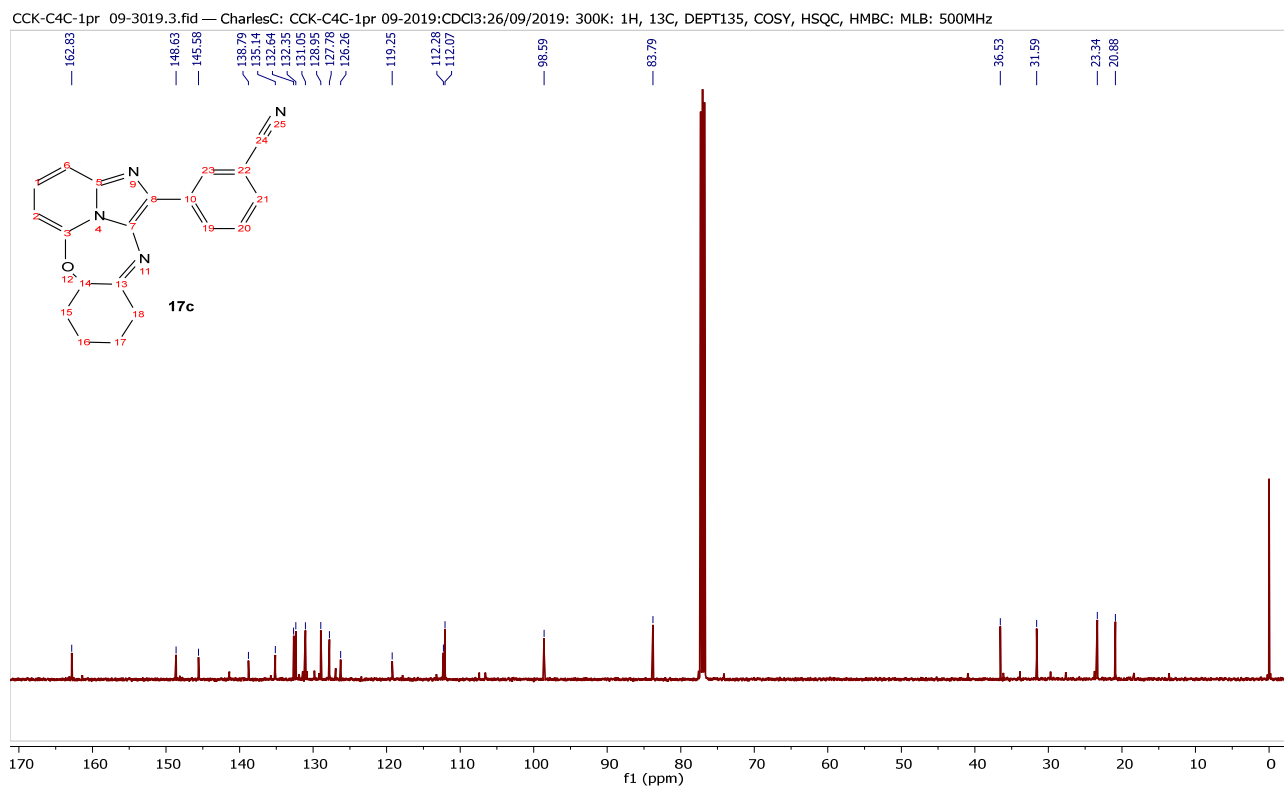

# NMR spectra for *rac*-18

CCK-C1F-2.10.fid — CharlesC:CCK-C1F-2:CDCl3:26/6/2019:300K:1H 400MHz:MLB

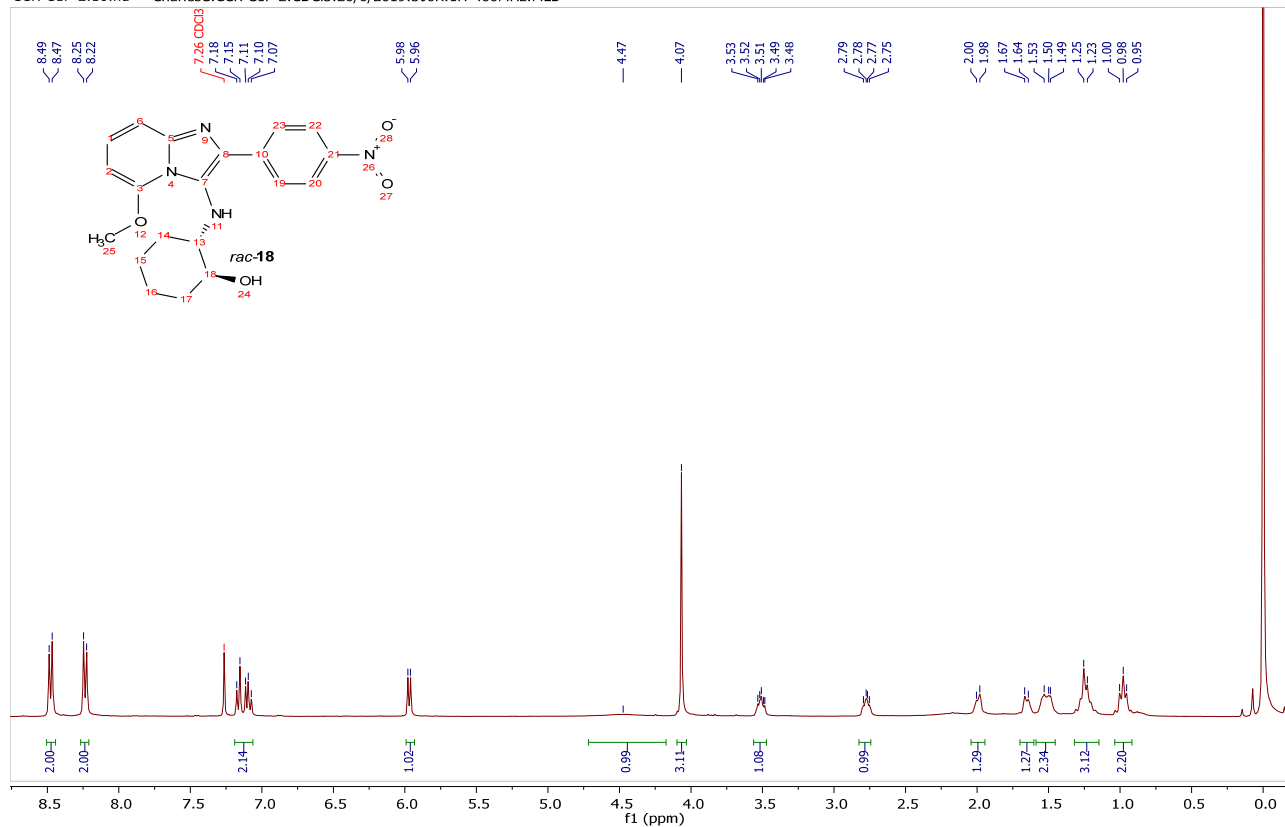

CCK-C1F-2.11.fid — CharlesC:CCK-C1F-2:CDCl3:26/6/2019:300K:1H 400MHz:MLB

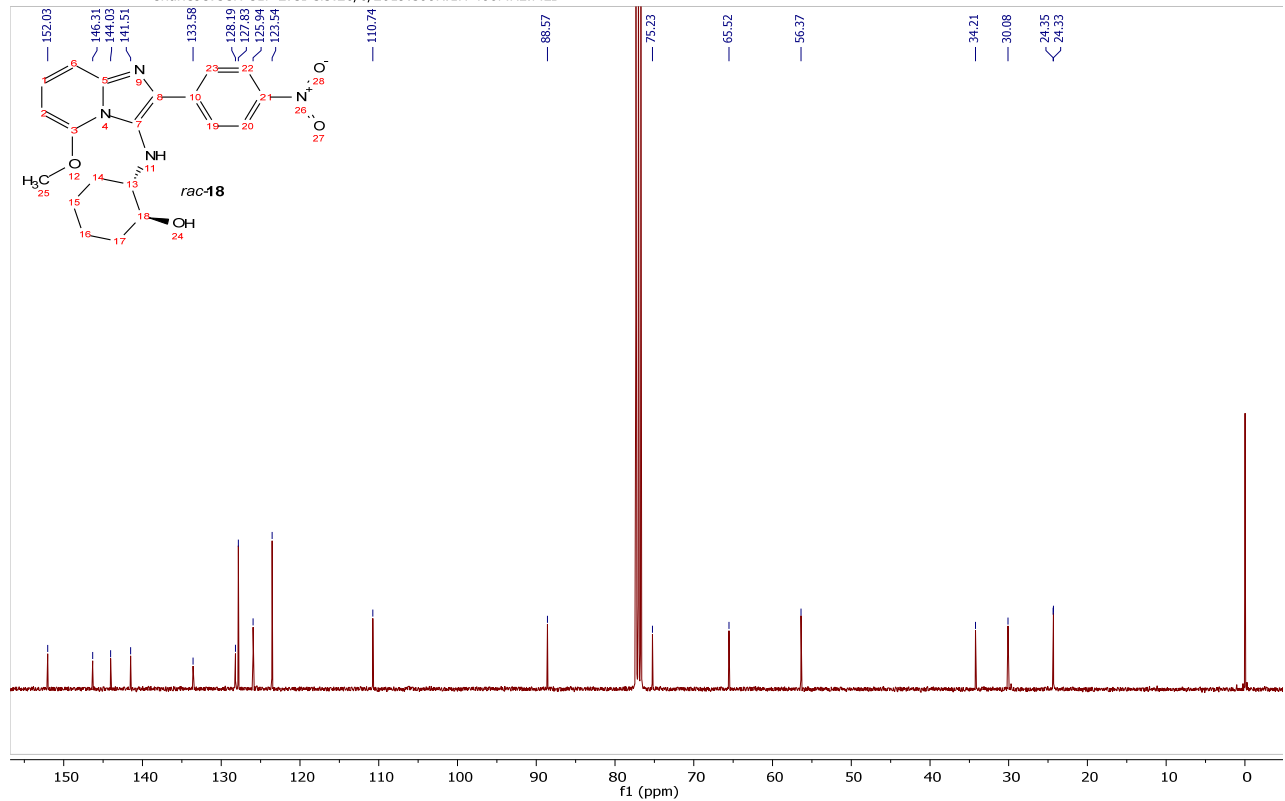

# NMR spectra for *rac-20a*

CCK-C5C 9-2019.1.fid — CharlesC:CCK-C5C 9-2019:CDCl3:RT:H,13C,DEPT,COSY,HSQC:MLB:500MHz

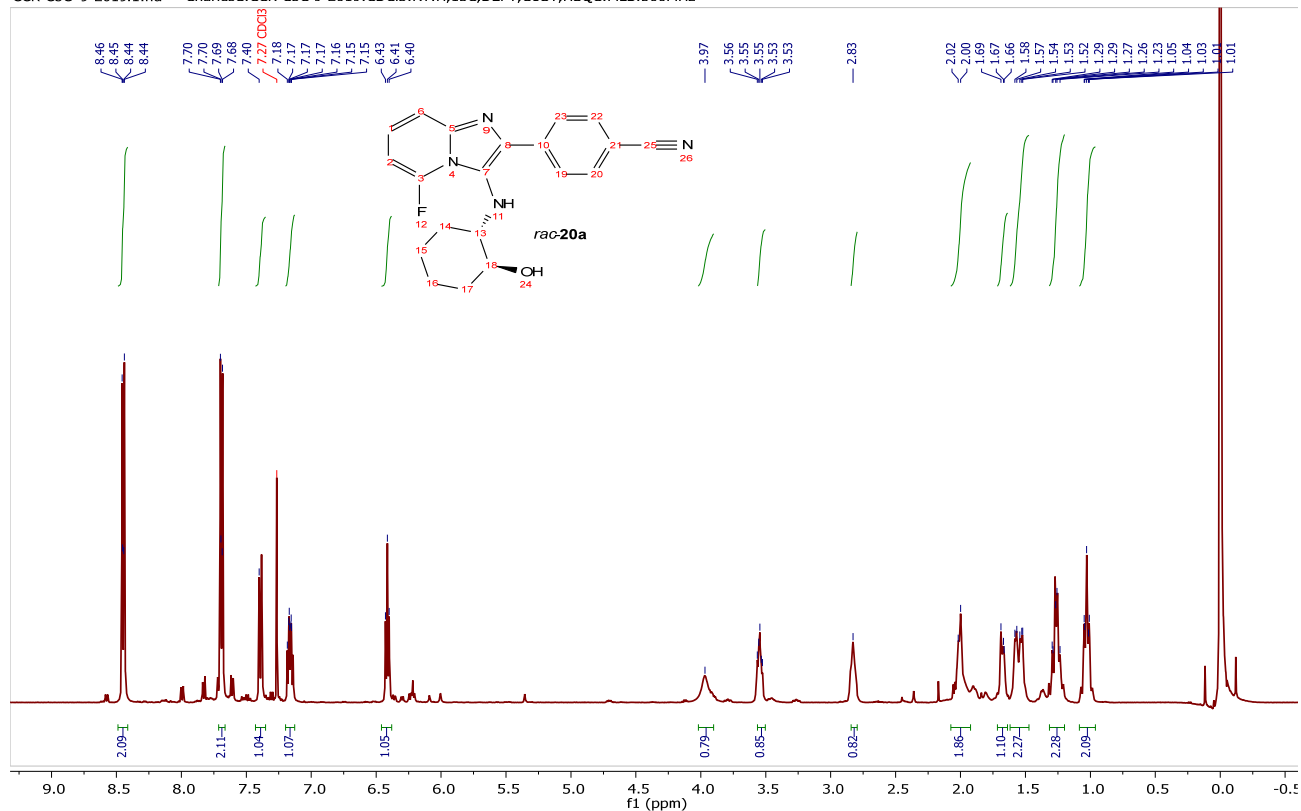

CCK-C5C 9-2019.2.fid — CharlesC:CCK-C5C 9-2019:CDCl3:RT:H,13C,DEPT,COSY,HSQC:MLB:500MHz

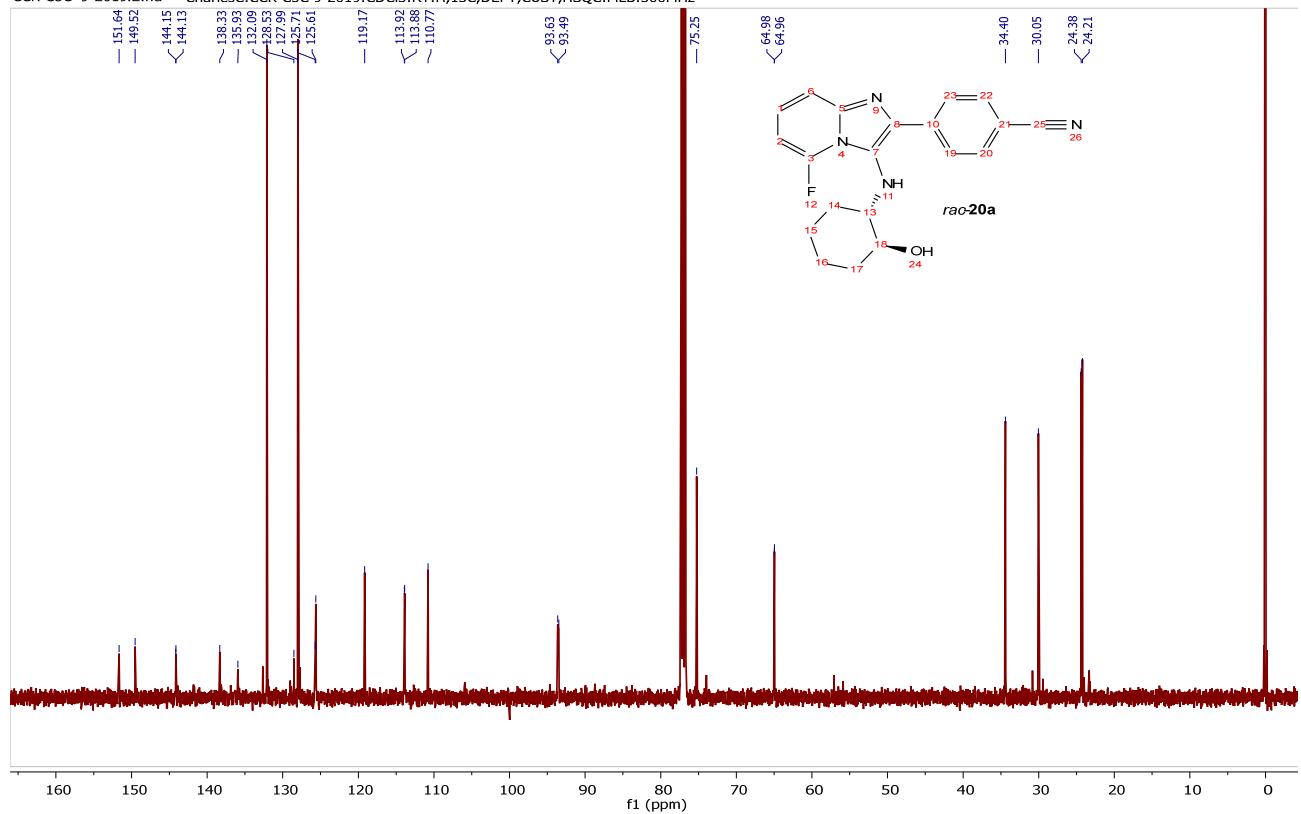

# NMR spectra for *rac*-20b

CCK-C6C.7.fid — CharlesC:CCK-C6C 9-2019:CDCl3:4/9/2019:300K:H,13C,COSY,DEPT,HSQC:MLB:500MHz

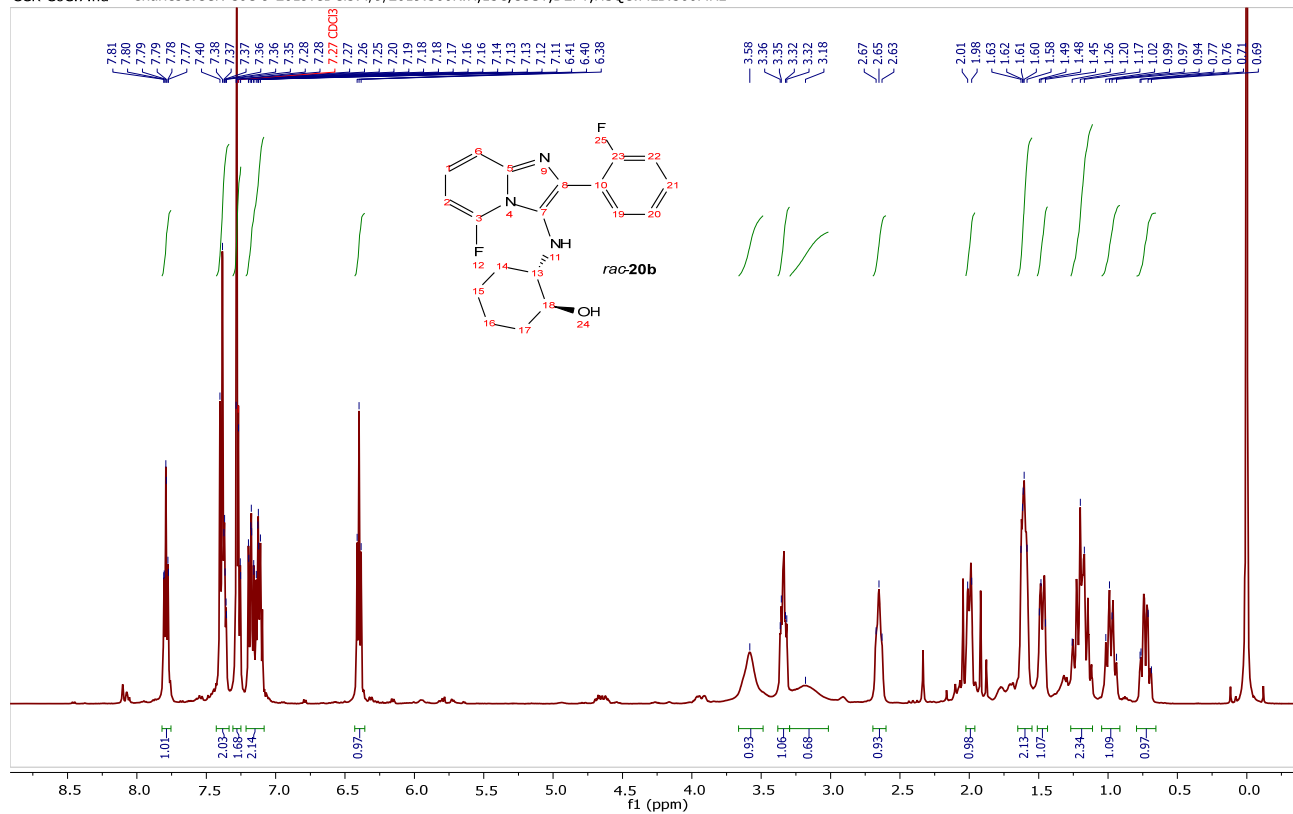

CCK-C6C.8.fid — CharlesC:CCK-C6C 9-2019:CDCl3:4/9/2019:300K:H,13C,COSY,DEPT,HSQC:MLB:500MHz

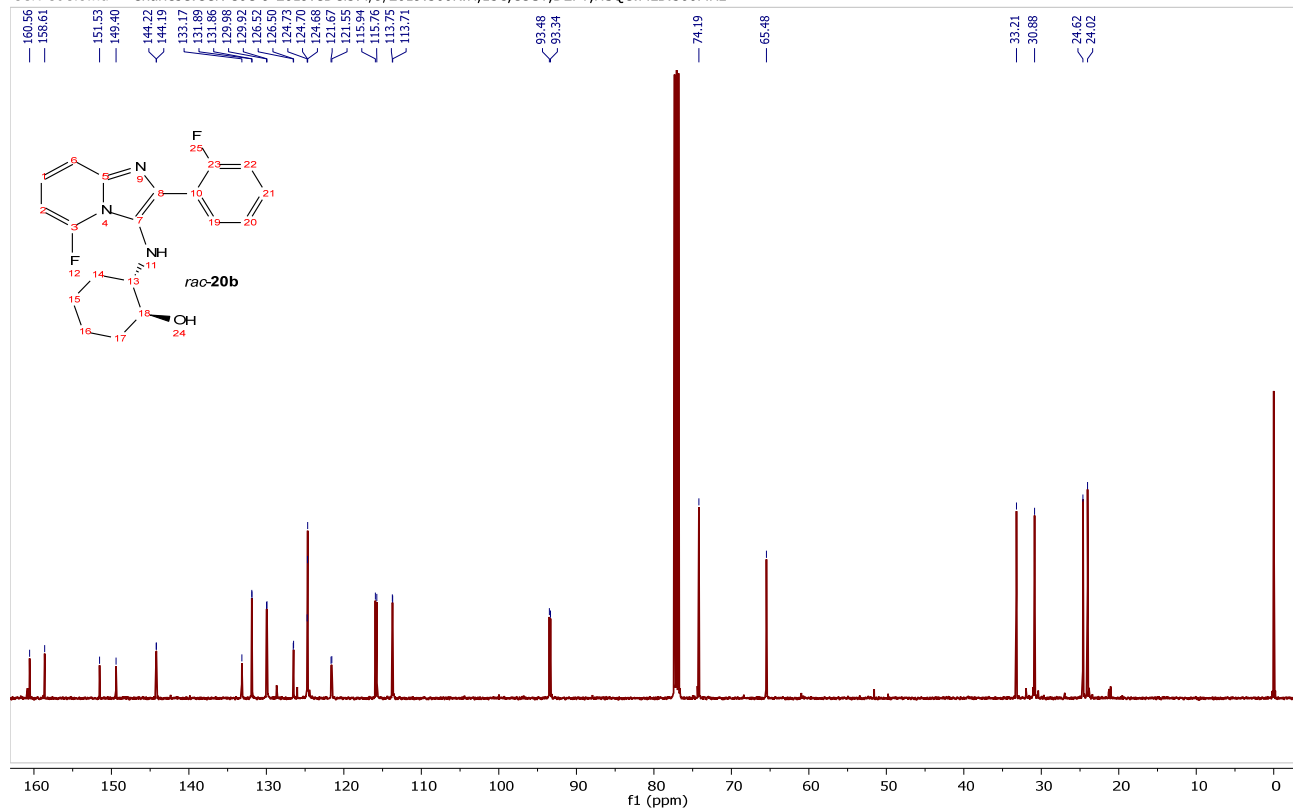

NMR spectra for *rac*-20c

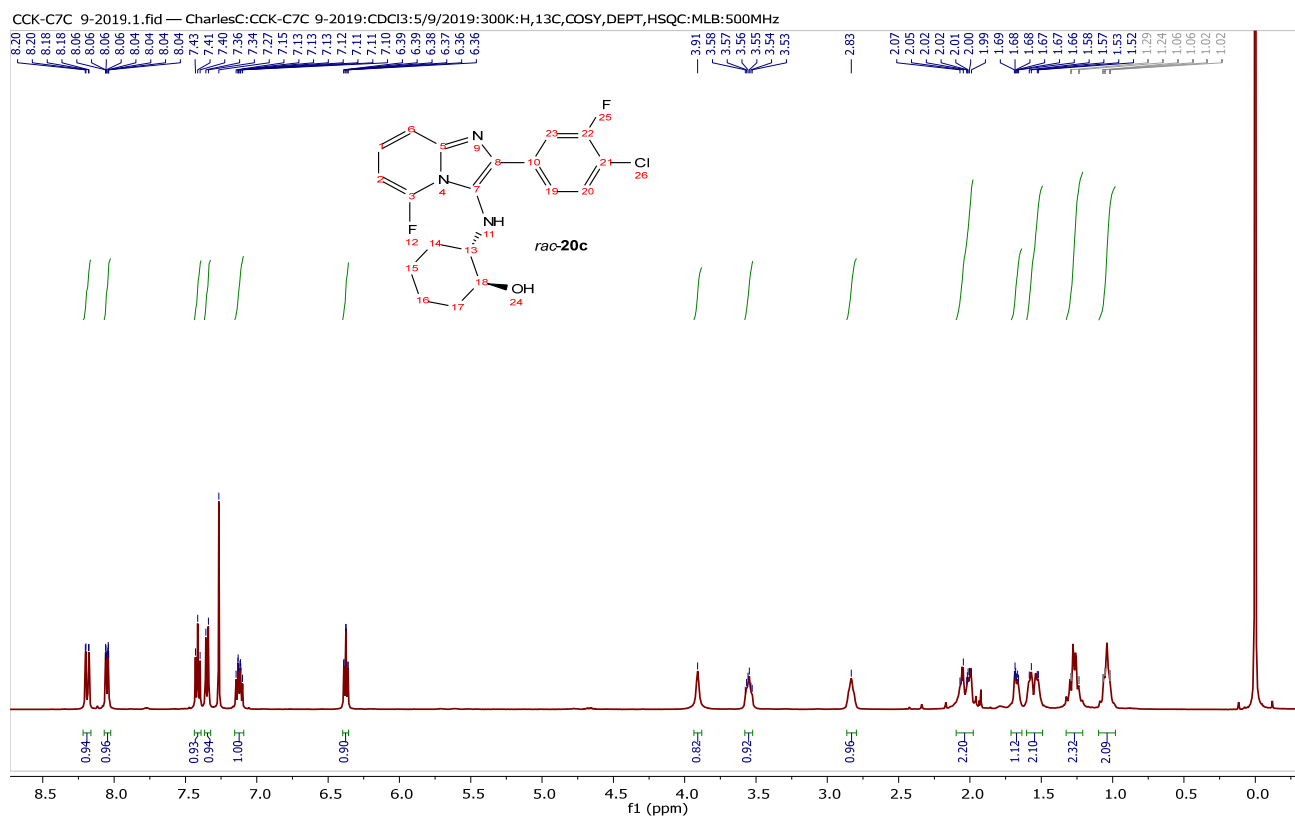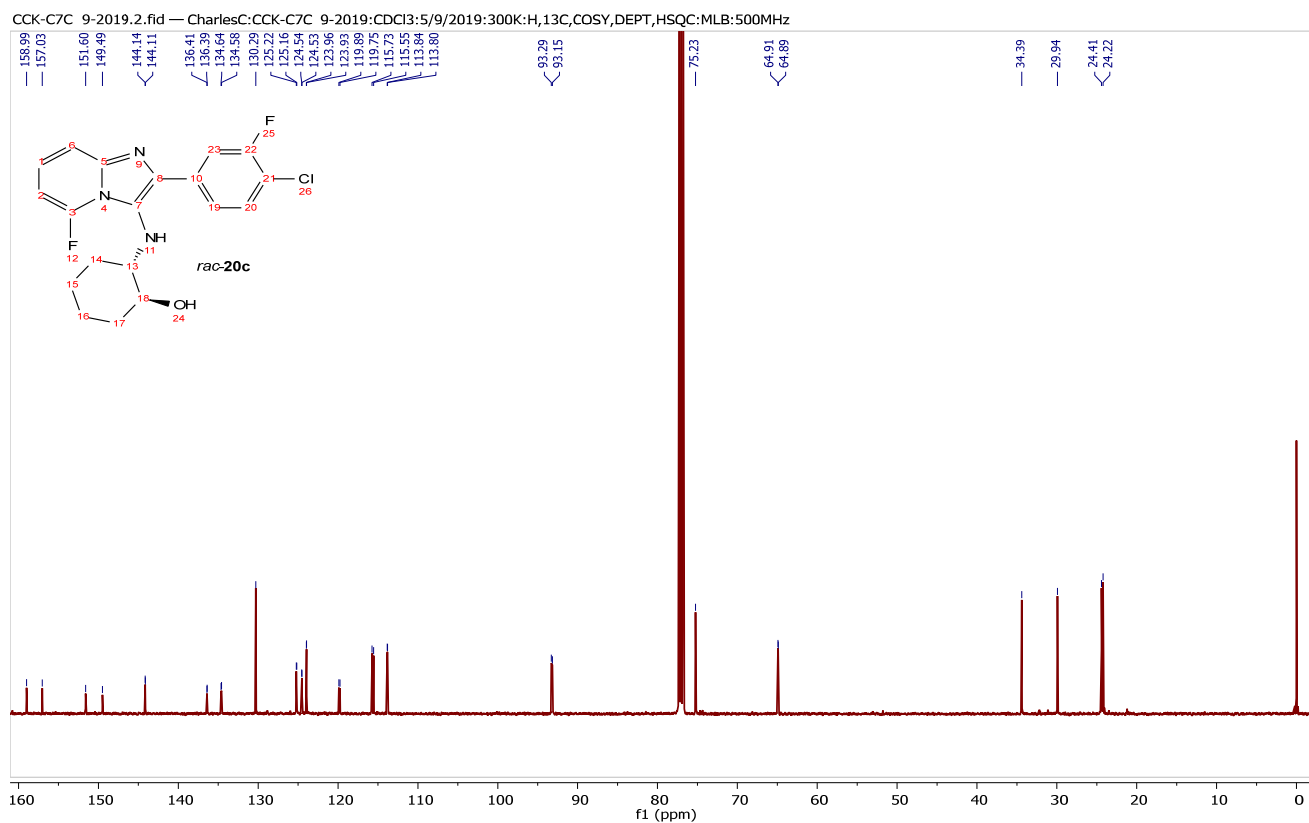

# NMR spectra for *rac*-20d

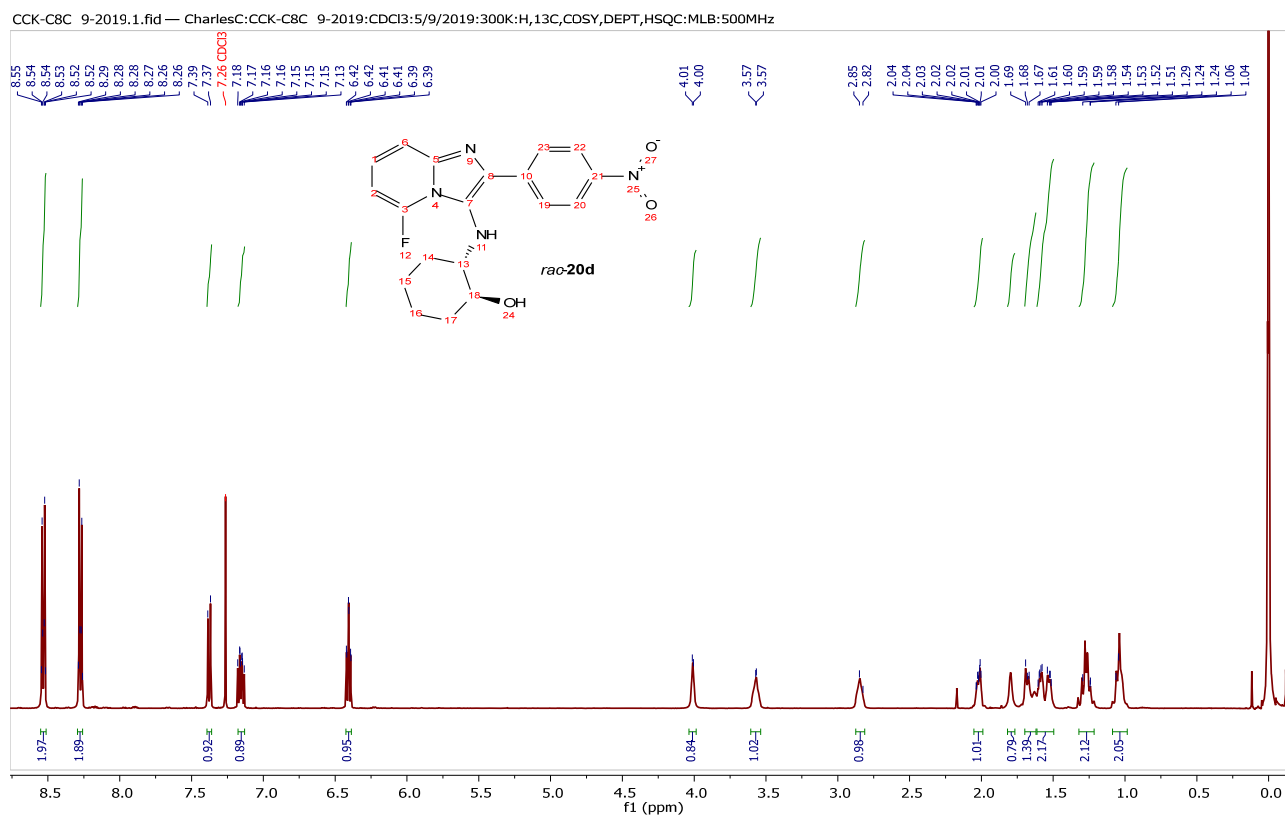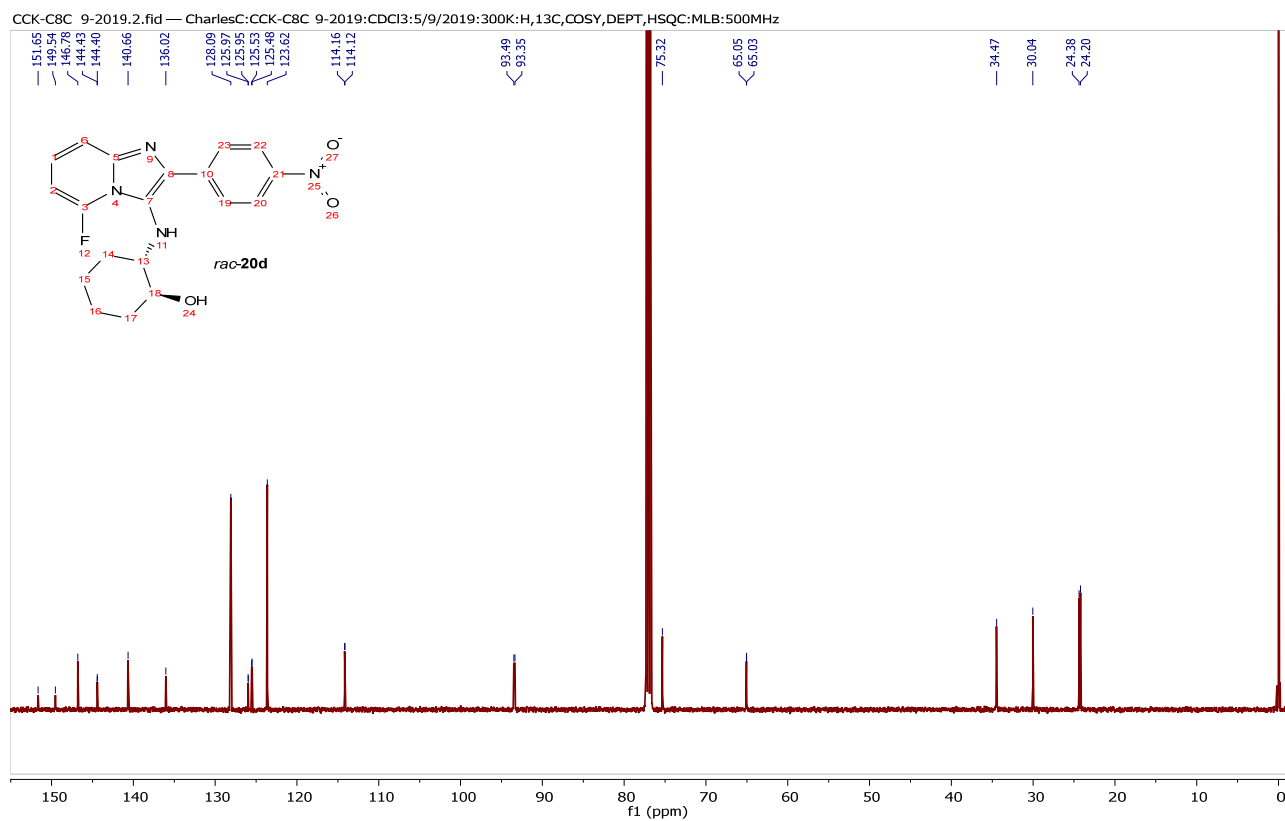



# NMR spectra for *rac*-20e

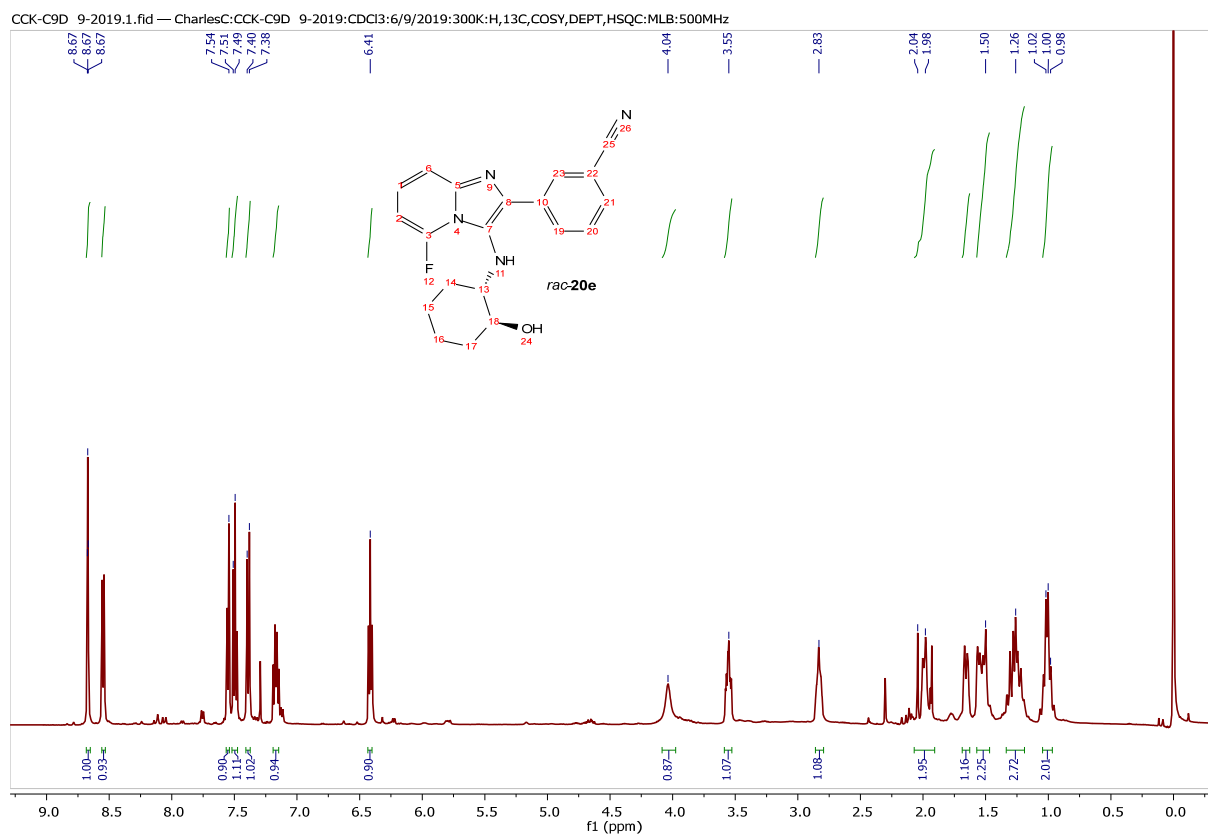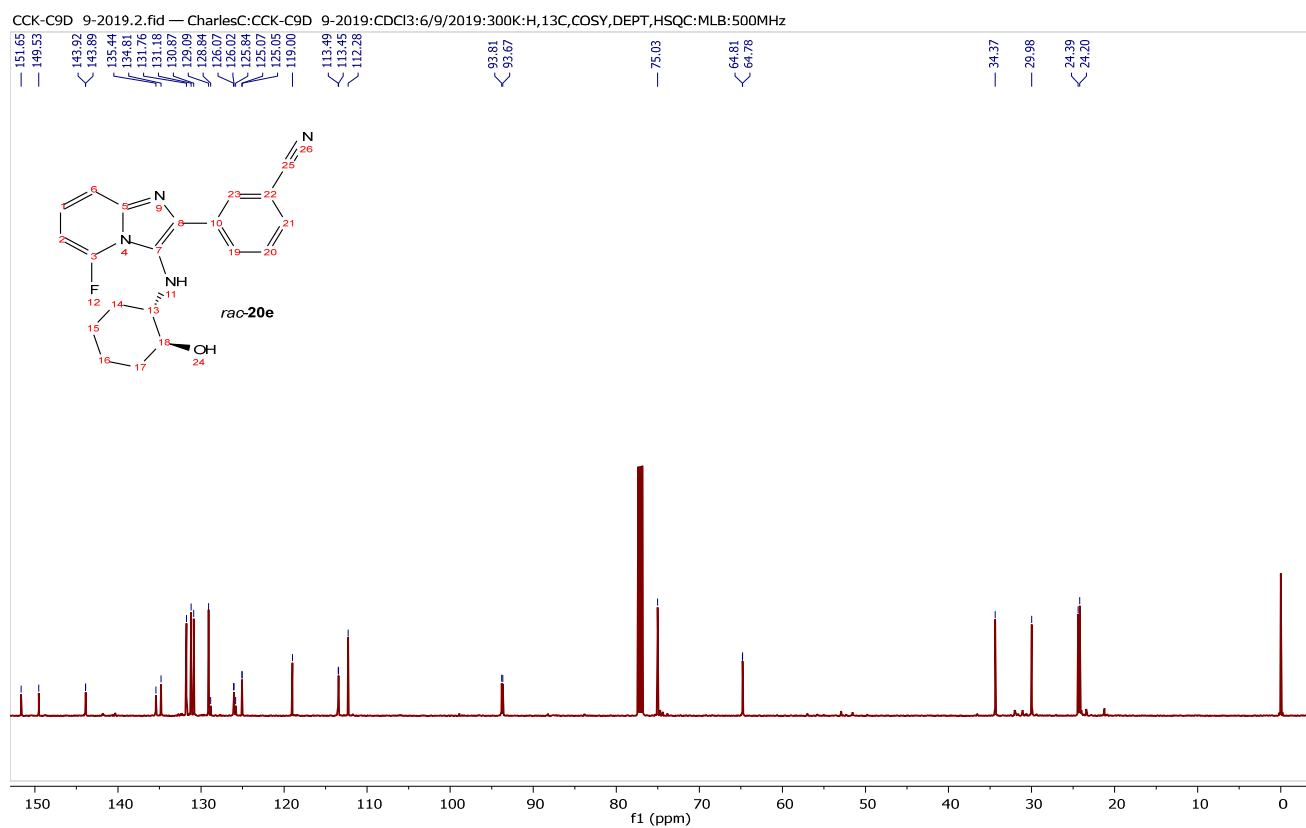

# NMR spectra for *rac*-20f

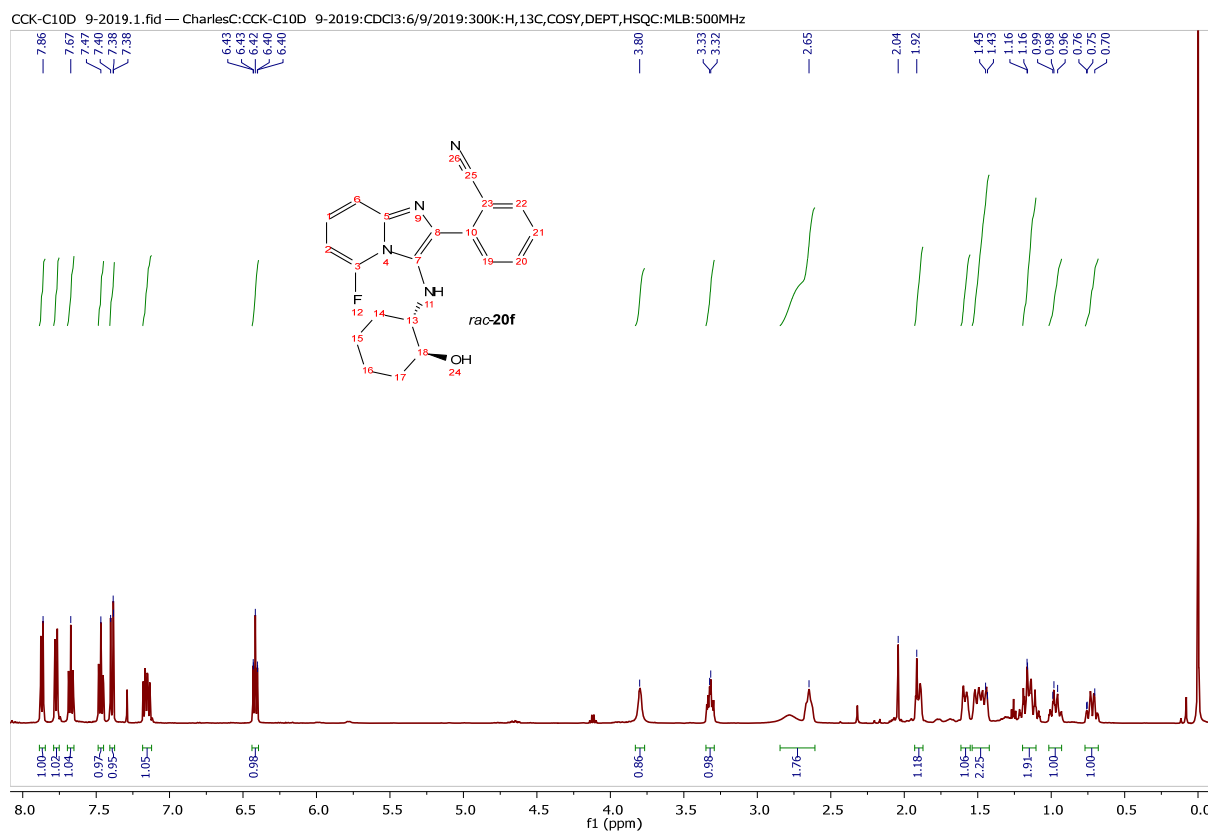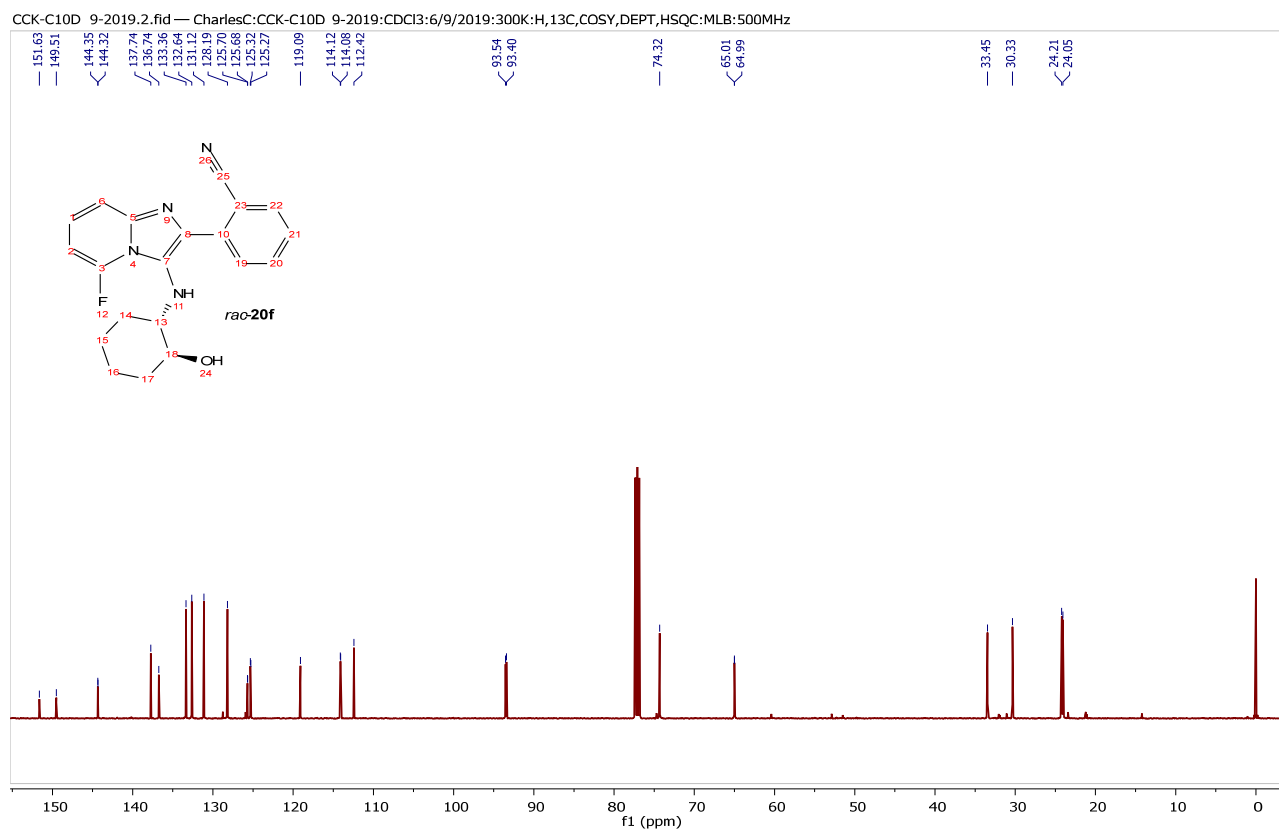

NMR spectra for *rac*-20g

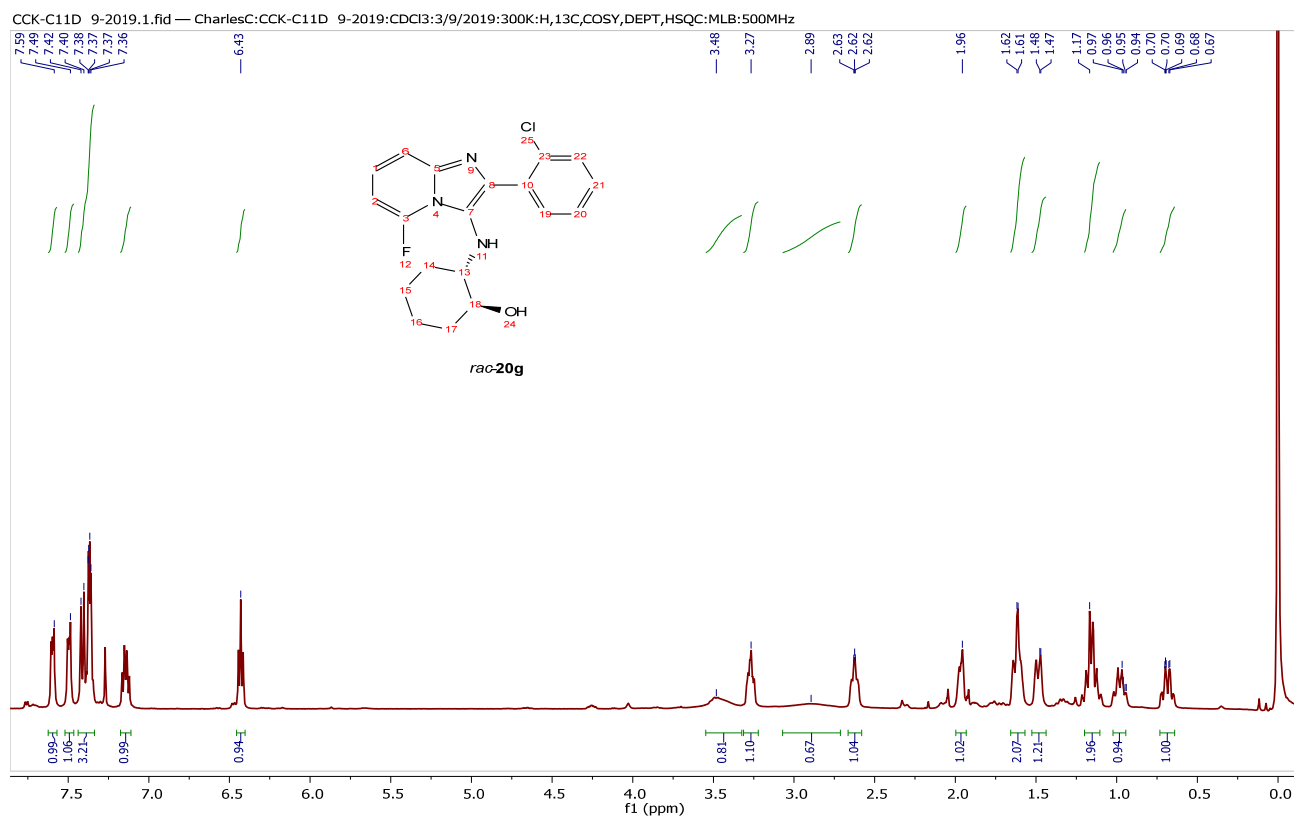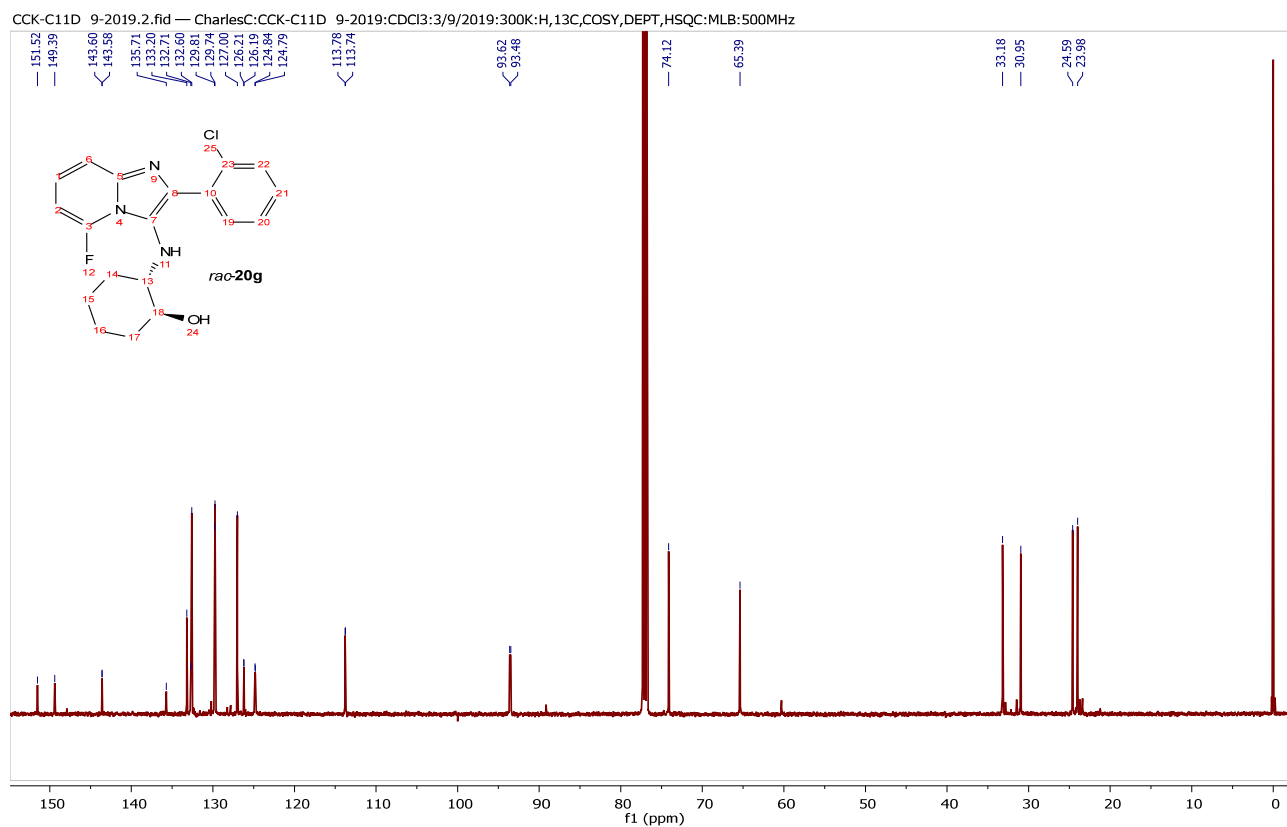

Supplement: c9ra10447j1.pdf [file c9ra10447j1.pdf]
